# Supplementary material for: Stem cells and fluid flow drive cyst formation in an invertebrate excretory organ
Source: eLife journal article supplement (doi:10.7554/elife.07405), 2015-06-09
Supplement: figures [file elife-07405-figures-v2.pdf]

---

## Figures and figure supplements

Stem cells and fluid flow drive cyst formation in an invertebrate excretory organ

**Hanh Thi-Kim Vu, et al.**

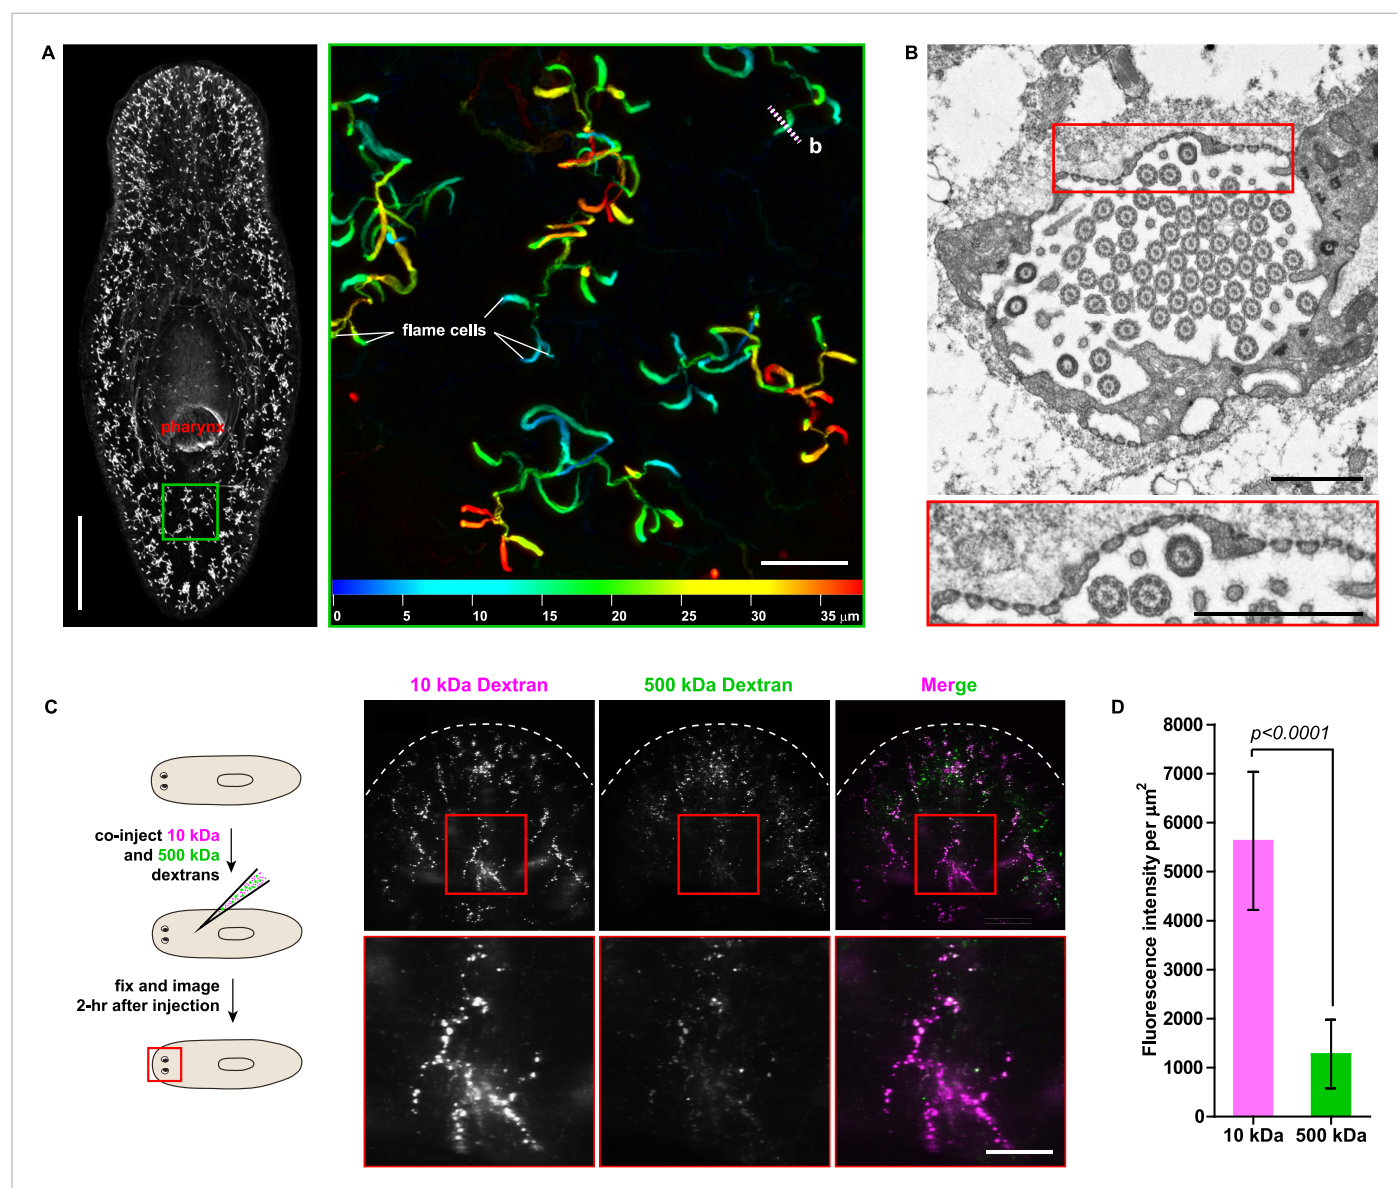

**Figure 1.** Protonephridia are ultrafiltration devices in planarians. **(A)** Whole-mount acetylated tubulin (AcTub) staining. Scale bars: 500  $\mu\text{m}$ . Inset shows depth-coded projection of AcTub staining. Superficial structures are in blue and deeper structures are in red. Scale bars: 50  $\mu\text{m}$ . **(B)** Cross-section through a flame cell. Inset shows a high magnification of filtration diaphragm. Scale bar: 1  $\mu\text{m}$ . **(C, D)** Ultrafiltration assay assessing ultrafiltration capacity in the planarian protonephridia. **(C)** Fluorescent overlay showing dextran uptake in the animals that co-injected with 10 kDa and 500 kDa fluorescently labeled dextran. Inset showing a high magnification of tubule structure labeled by dextran. Scale bar: 100  $\mu\text{m}$ . **(D)** Quantification of small and large dextran uptake.

DOI: [10.7554/eLife.07405.003](https://doi.org/10.7554/eLife.07405.003)



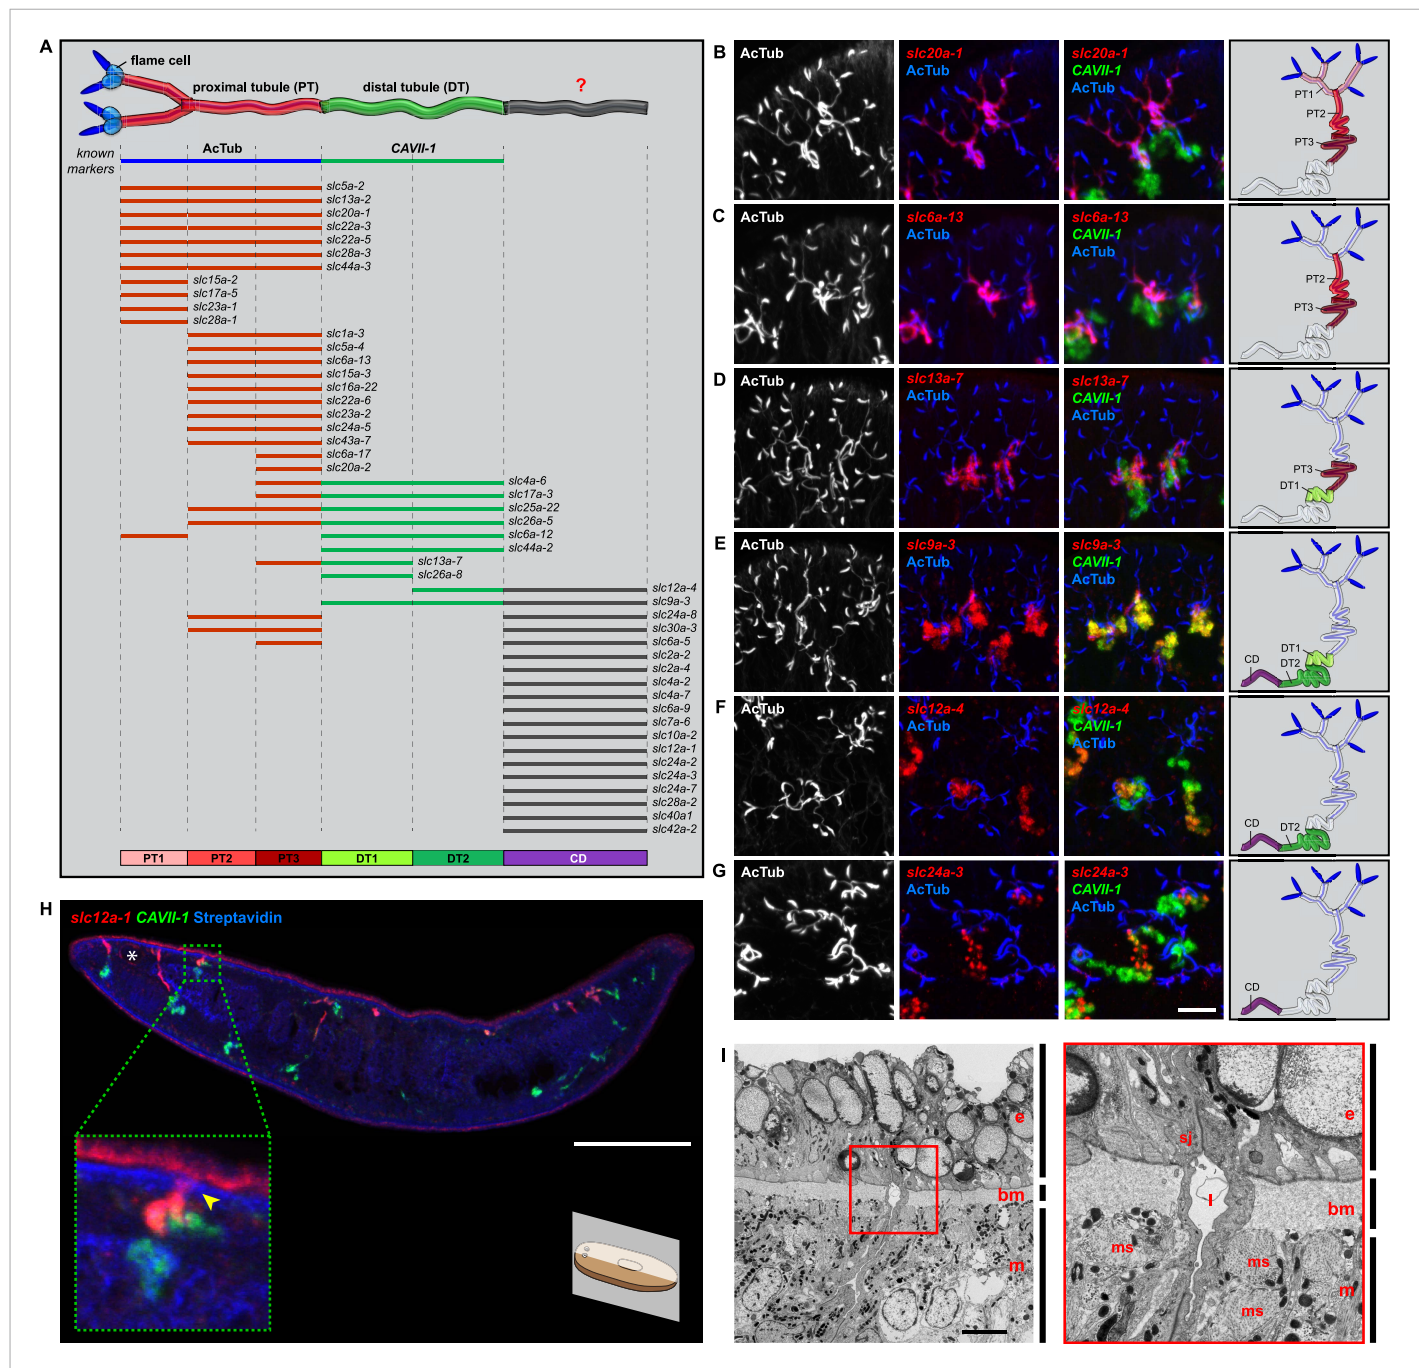

**Figure 2.** Unexpected complexity of protonephridial tubules is revealed by systematic gene expression mapping of *slc* genes along the protonephridial tubules. **(A)** Cartoon shows previous segmentation model of the protonephridial tubule and expression map of *slc* genes along the protonephridial tubule. **(B–G)** Representative images show expression domains of selected *slc* genes in **(B)** PT1, PT2 and PT3, **(C)** PT2 and PT3, **(D)** PT3, **(E)** DT1, DT2 and CD, **(F)** DT2 and CD and **(G)** CD. Fluorescent overlay of the indicated gene (red) with PT marker (AcTub) and distal tubule (DT) marker (CAVII-1). A color-coded scheme of the protonephridial tubule at the end of each panel represents the expression domain of the indicated gene. Images are maximum projections of confocal Z-sections. Scale bars: 50  $\mu$ m. **(H)** Longitudinal-section through a worm shows a dorsal-bias expression of *slc12a-1*. Fluorescent overlay of *slc12a-1* with DT marker (CAVII-1) and streptavidin (which labels the basement membrane of several planarian epithelial structures, including the outer epithelium). Inset shows a magnification of CD, visualized by *slc12a-1*, crossing the basement membrane of the dorsal epithelia. Yellow arrowhead, exterior opening of the CD. Scale bars: 200  $\mu$ m. **(I)** TEM image shows CD connected to the dorsal epithelia. Inset shows a magnification of CD connected to the dorsal epithelia. e, epithelia; bm, basement membrane; m, mesenchyme; sj, septate junction; l, lumen; ms, muscle. Scale bars: 5  $\mu$ m.

DOI: 10.7554/eLife.07405.004

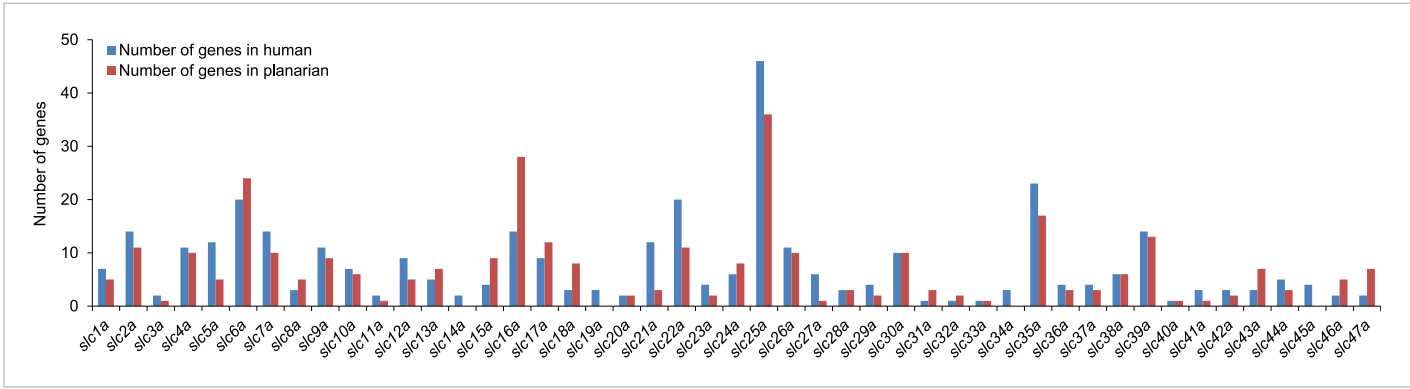

**Figure 2—figure supplement 1.** Solute carrier gene families in the planarian *Schmidtea mediterranea*.  
DOI: 10.7554/eLife.07405.005

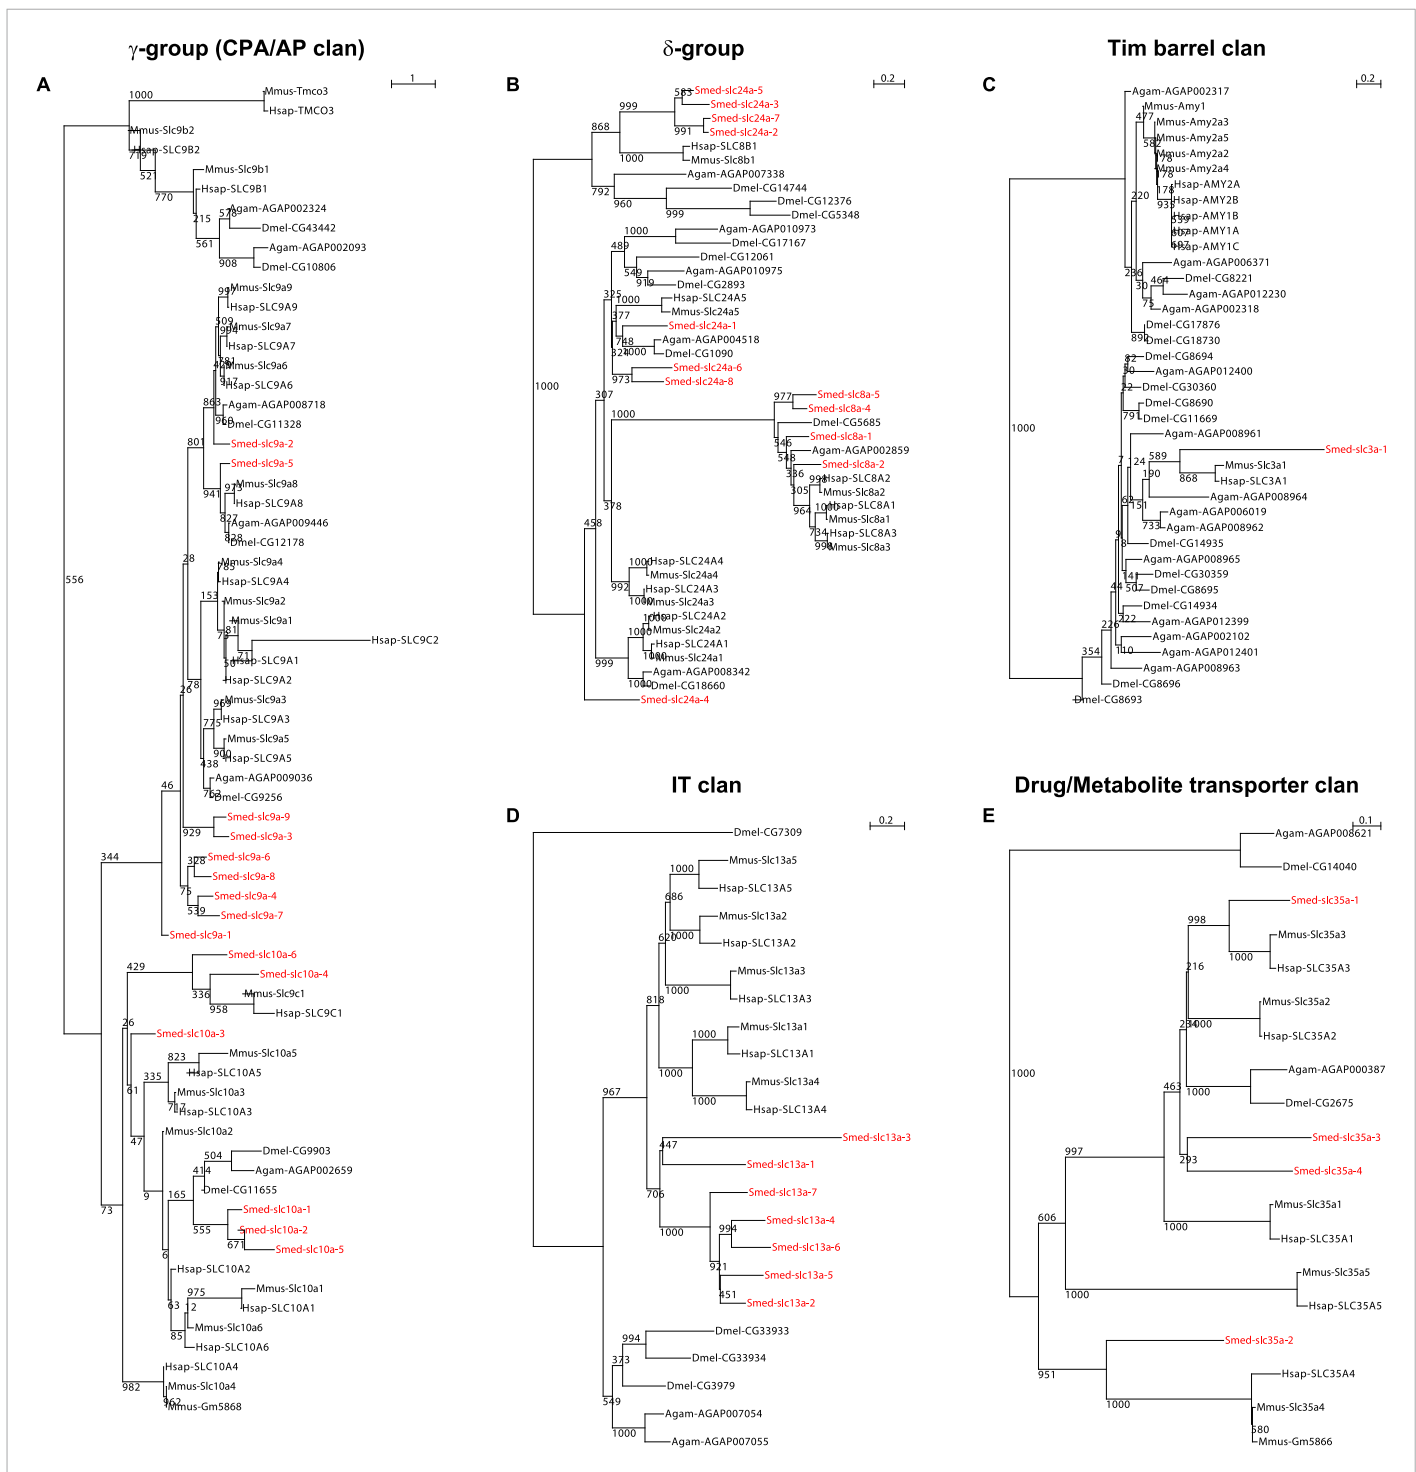

**Figure 2—figure supplement 2.** Schematic representation of phylogenetic clusters of  $\gamma$ - (A),  $\delta$ - (B) groups of *slcs* and the Tim barrel- (C), IT- (D), Drug/ Metabolite (E) transporter clans of *slcs*. Planarian homologs are colored in red.

DOI: [10.7554/eLife.07405.006](https://doi.org/10.7554/eLife.07405.006)

$\alpha$ -group (MFS clan)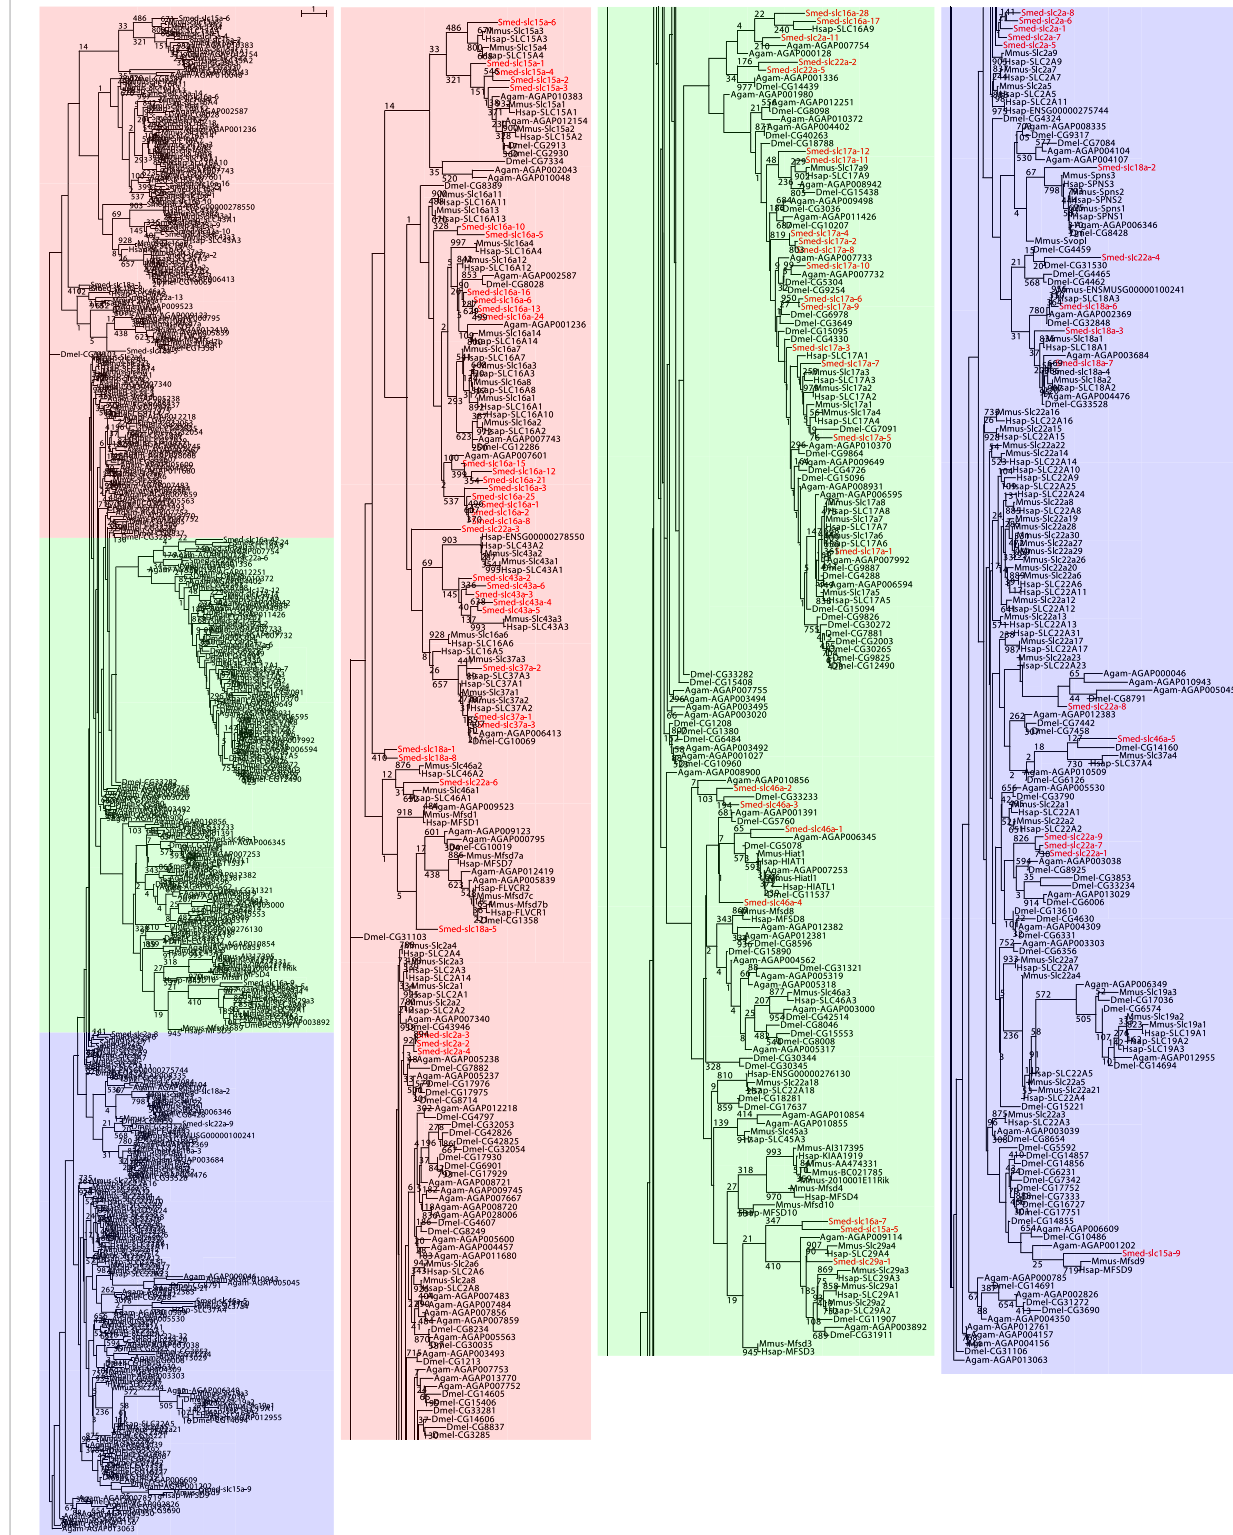

**Figure 2—figure supplement 3.** Schematic representation of phylogenetic clusters of  $\alpha$ -groups of s.lcs. Planarian homologs are colored in red.

DOI: [10.7554/eLife.07405.007](https://doi.org/10.7554/eLife.07405.007)

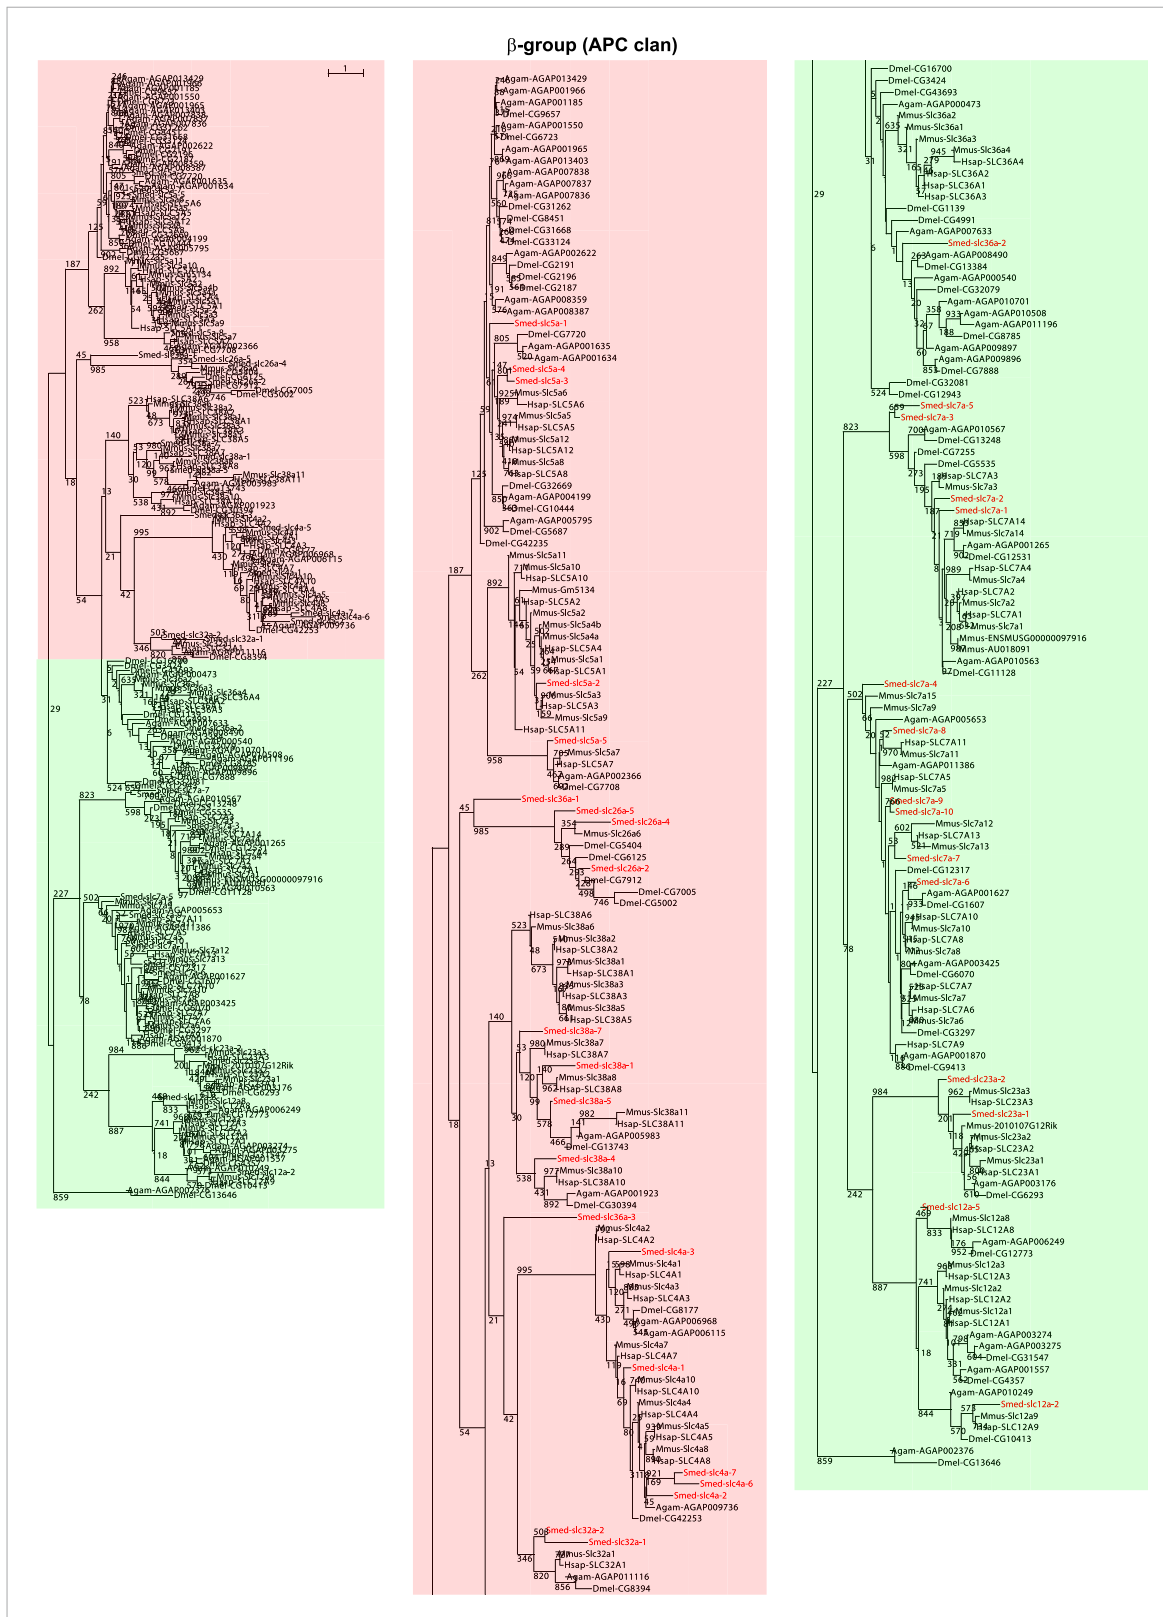

**Figure 2—figure supplement 4.** Schematic representation of phylogenetic clusters of  $\beta$ -groups of slcs. Planarian homologs are colored in red.

DOI: [10.7554/eLife.07405.008](https://doi.org/10.7554/eLife.07405.008)



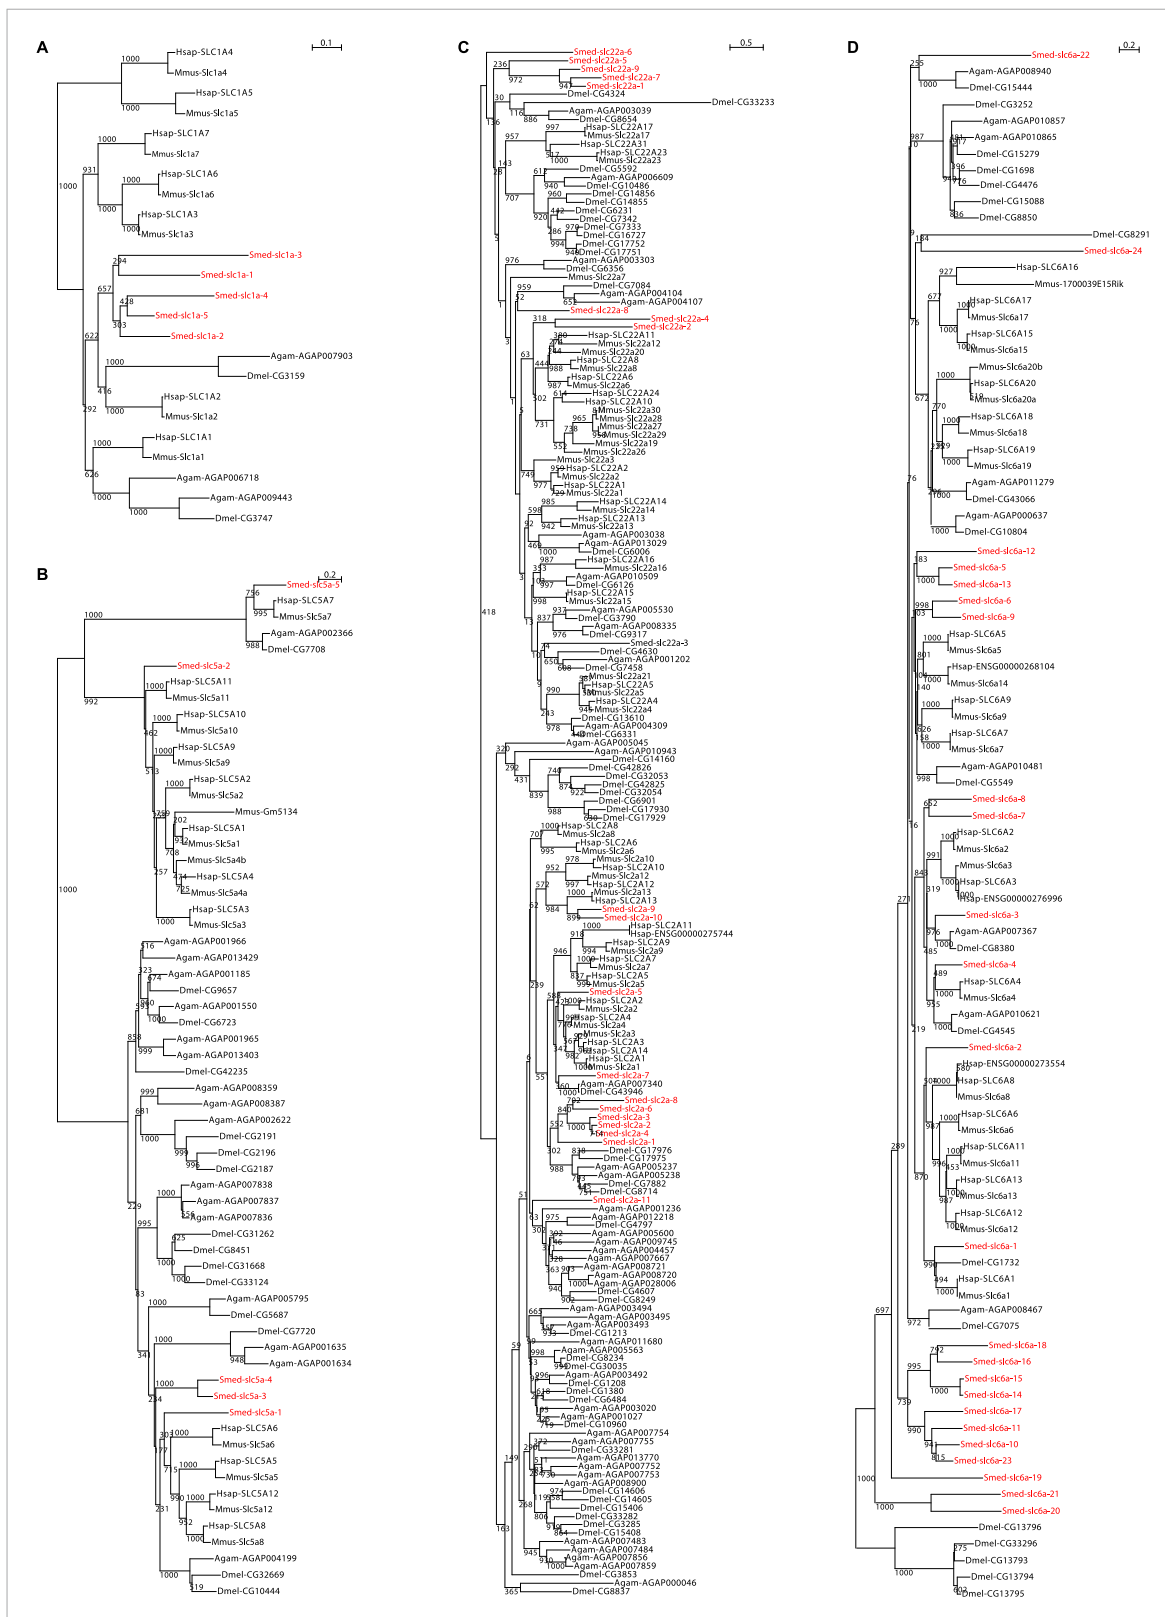

**Figure 2—figure supplement 5.** Schematic representation of phylogenetic clusters of Smed-slc1a (A), Smed-slc5a (B), Smed-slc22a (C), Smed-slc6a (D). Planarian homologs are colored in red.

DOI: 10.7554/eLife.07405.009

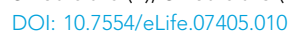

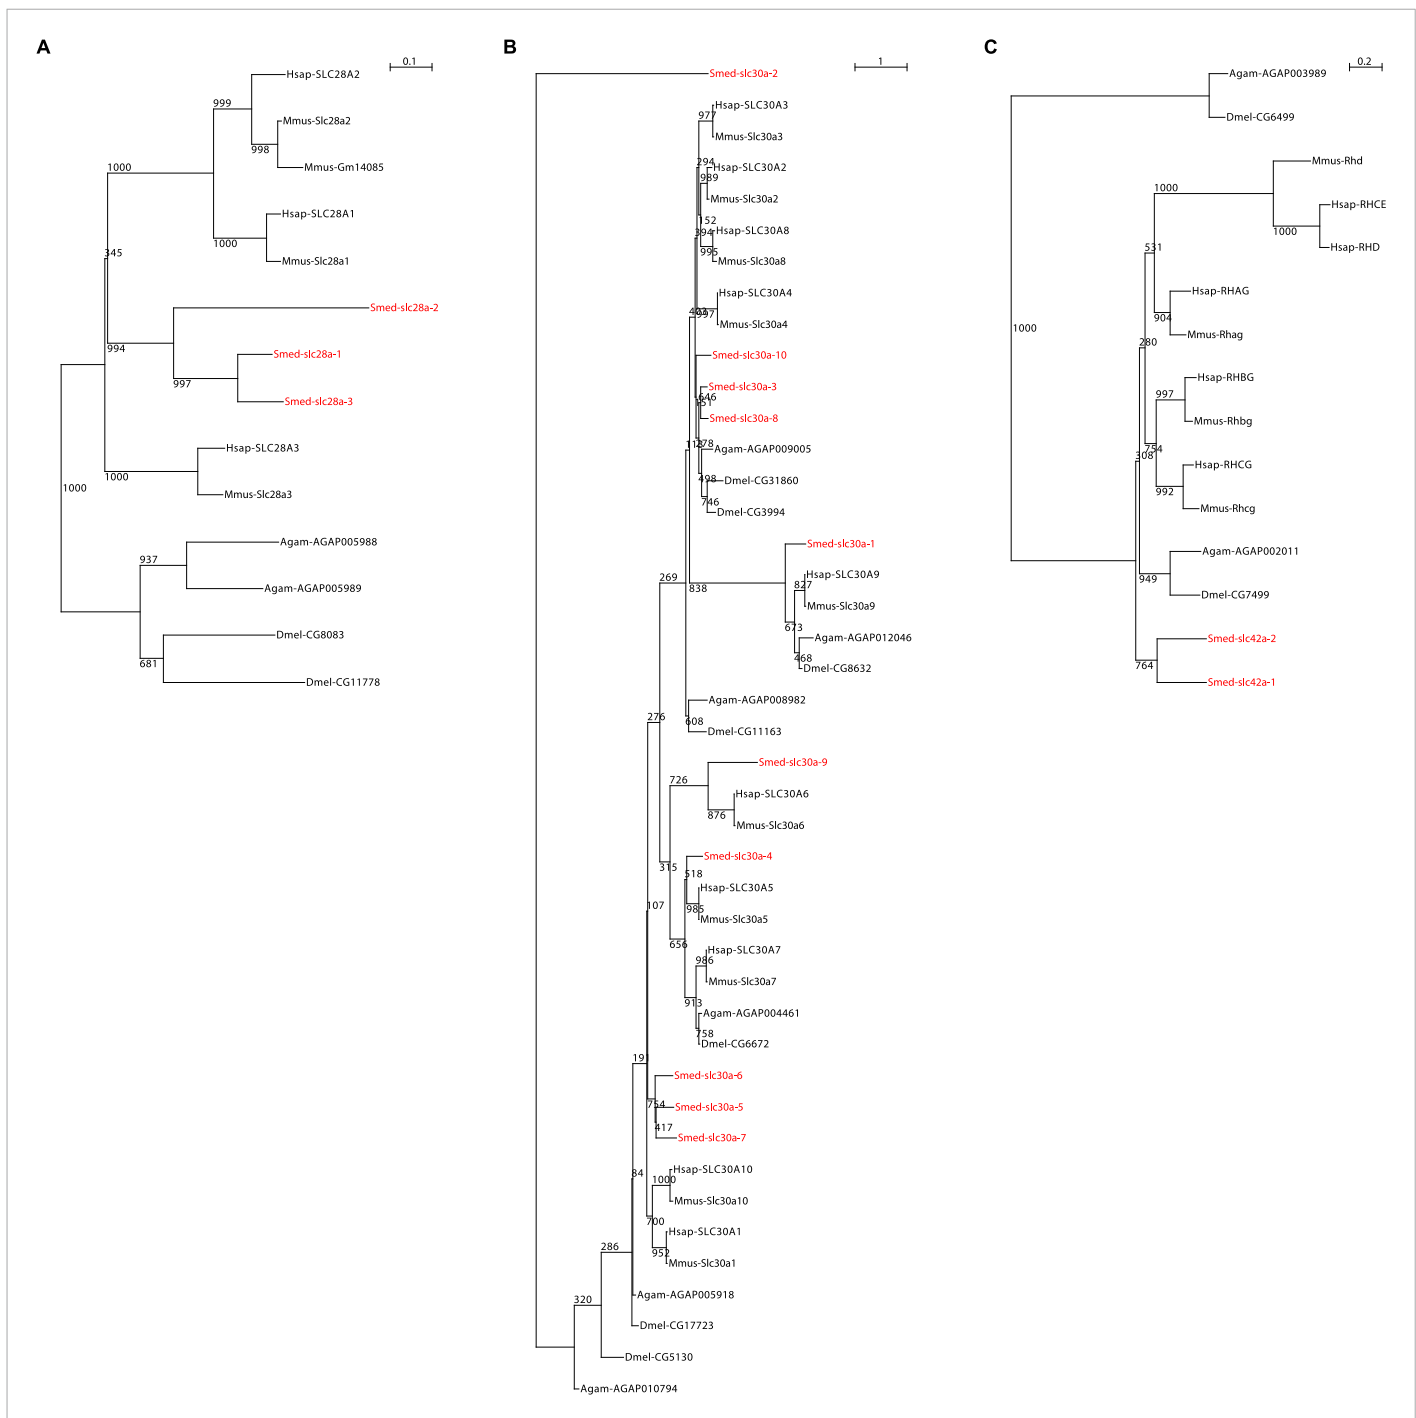

**Figure 2—figure supplement 7.** Schematic representation of phylogenetic clusters of Smed-slc28 (A), Smed-slc30 (B), and Smed-slc42 (C). Planarian homologs are colored in red.

DOI: [10.7554/eLife.07405.011](https://doi.org/10.7554/eLife.07405.011)

## Solute carrier family 1: High-affinity glutamate and neutral amino acid transporter family

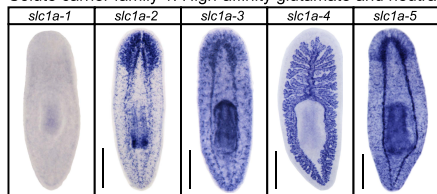

## Solute carrier family 2: Facilitative GLUT transporter family

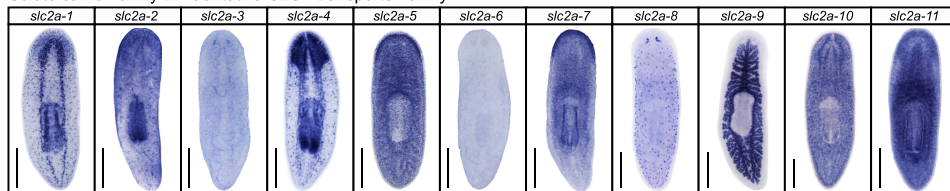

## Solute carrier family 3: Heavy subunits of heterodimeric amino acid transporters

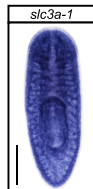

## Solute carrier family 4: Bicarbonate transporter family

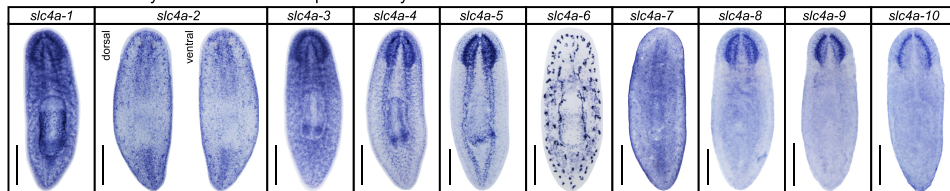

## Solute carrier family 5: Sodium glucose cotransporter family

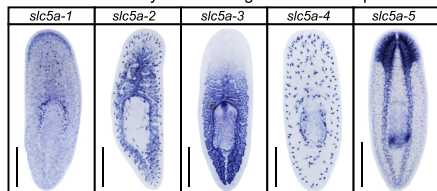

## Solute carrier family 6: Sodium- and chloride-dependent sodium:neurotransmitter transporter family

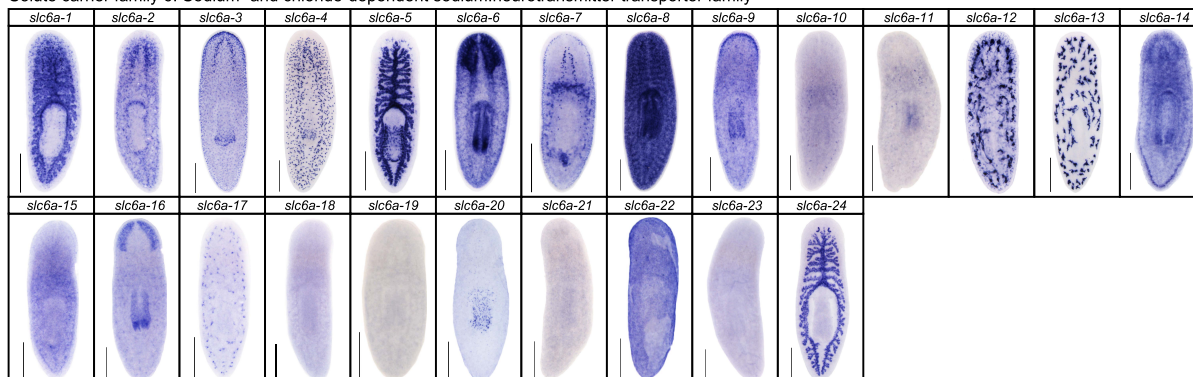

**Figure 2—figure supplement 8.** Expression patterns of *slc* genes that belong to solute carrier families 1–6 in an asexual strain of the planarian *S. mediterranea*. Whole-mount expression patterns of *slc* genes by in situ hybridization (NBT/BCIP development). Scale bars: 500  $\mu$ m.

DOI: [10.7554/eLife.07405.012](https://doi.org/10.7554/eLife.07405.012)

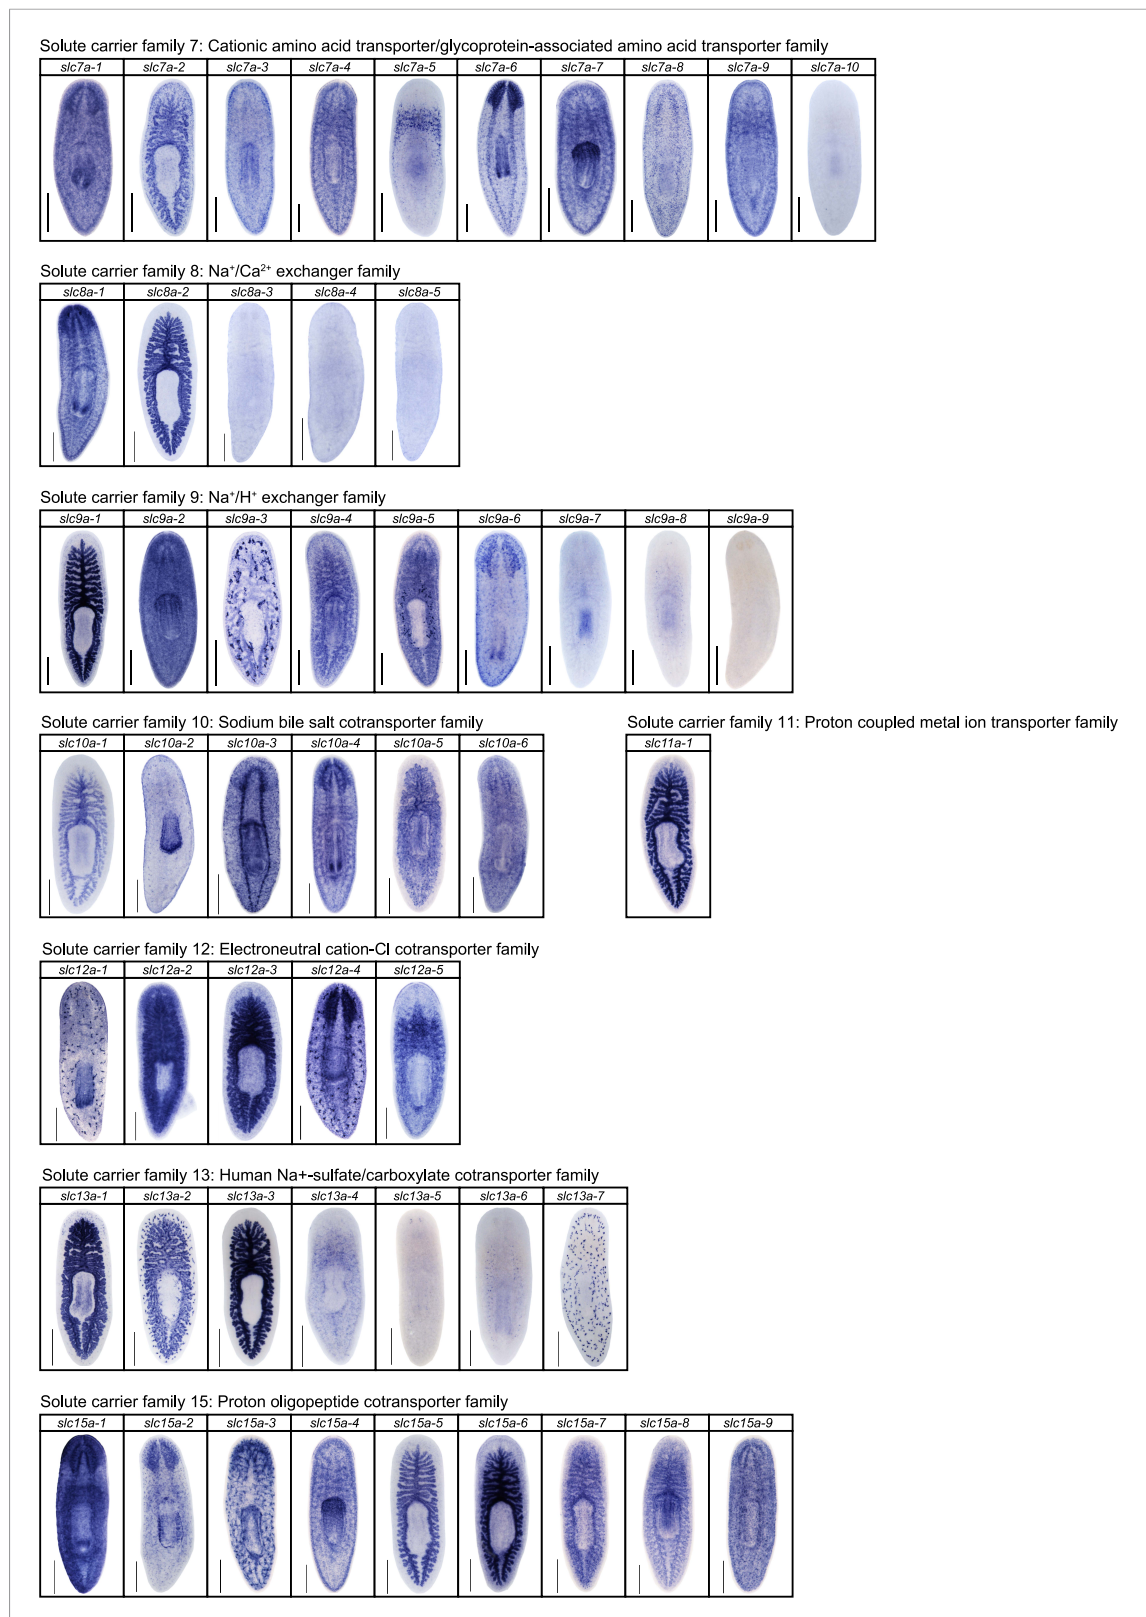

**Figure 2—figure supplement 9.** Expression patterns of *slc* genes that belong to solute carrier families 7–15 in an asexual strain of the planarian *S. mediterranea*. Whole-mount expression patterns of *slc* genes by in situ Figure 2—figure supplement 9. continued on next page



Figure 2—figure supplement 9. Continued  
hybridization (NBT/BCIP development). Scale bars: 500  $\mu$ m.  
DOI: [10.7554/eLife.07405.013](https://doi.org/10.7554/eLife.07405.013)

## Solute carrier family 16: Monocarboxylate transporter family

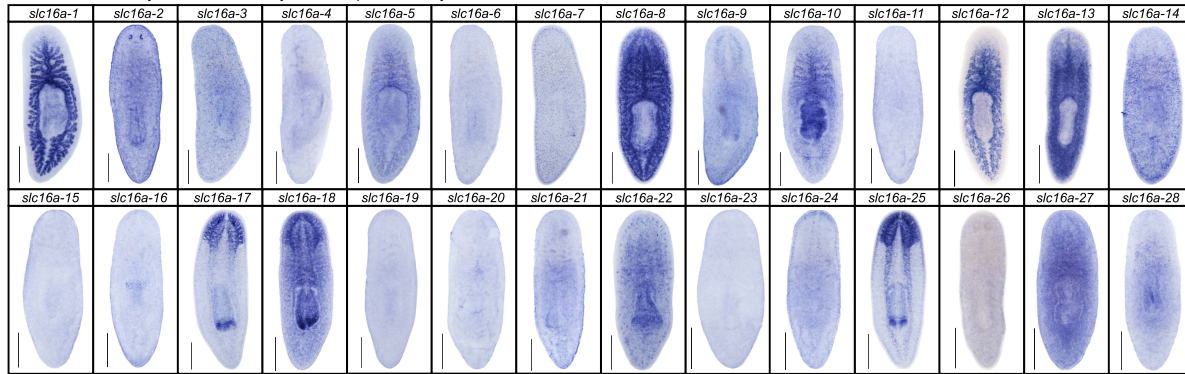

## Solute carrier family 17: Vesicular glutamate transporter family

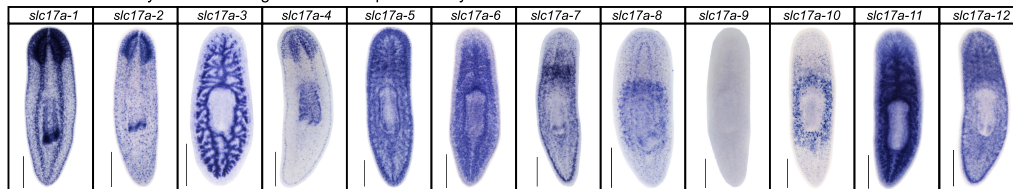

## Solute carrier family 18: Vesicular amine transporter family

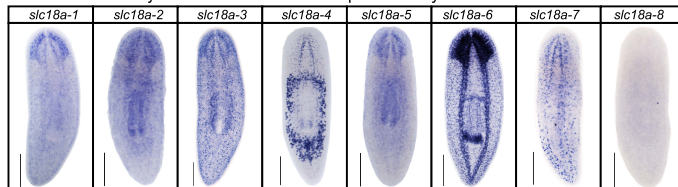Solute carrier family 20: Type-III Na<sup>+</sup>-phosphate cotransporter family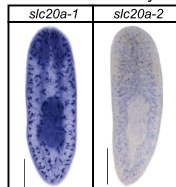

## Solute carrier family 21: Organic anion transporting family

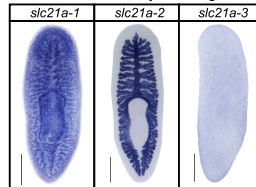

## Solute carrier family 22: Organic cation/anion/zwitterion transporter family

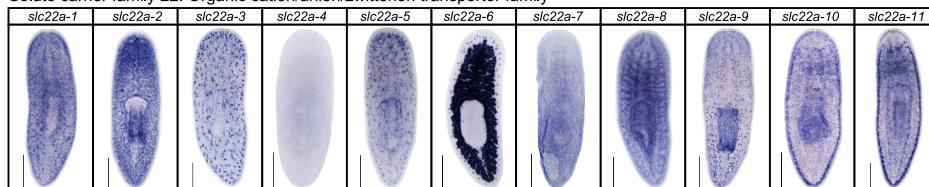Solute carrier family 23: Na<sup>+</sup>-dependent ascorbic acid transporter family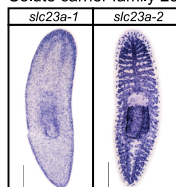

**Figure 2—figure supplement 10.** Expression patterns of *slc* genes that belong to solute carrier families 16–23 in an asexual strain of the planarian *S. mediterranea*. Whole-mount expression patterns of *slc* genes by in situ hybridization (NBT/BCIP development). Scale bars: 500  $\mu$ m.

DOI: [10.7554/eLife.07405.014](https://doi.org/10.7554/eLife.07405.014)

Solute carrier family 24: Na<sup>+</sup>/(Ca<sup>2+</sup>-K<sup>+</sup>) exchanger family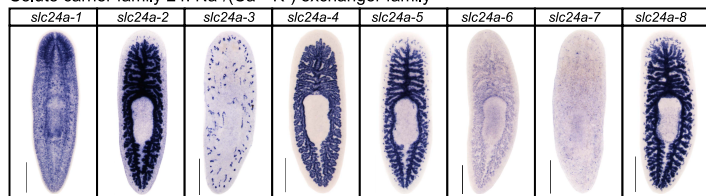

## Solute carrier family 25: Mitochondrial carrier family

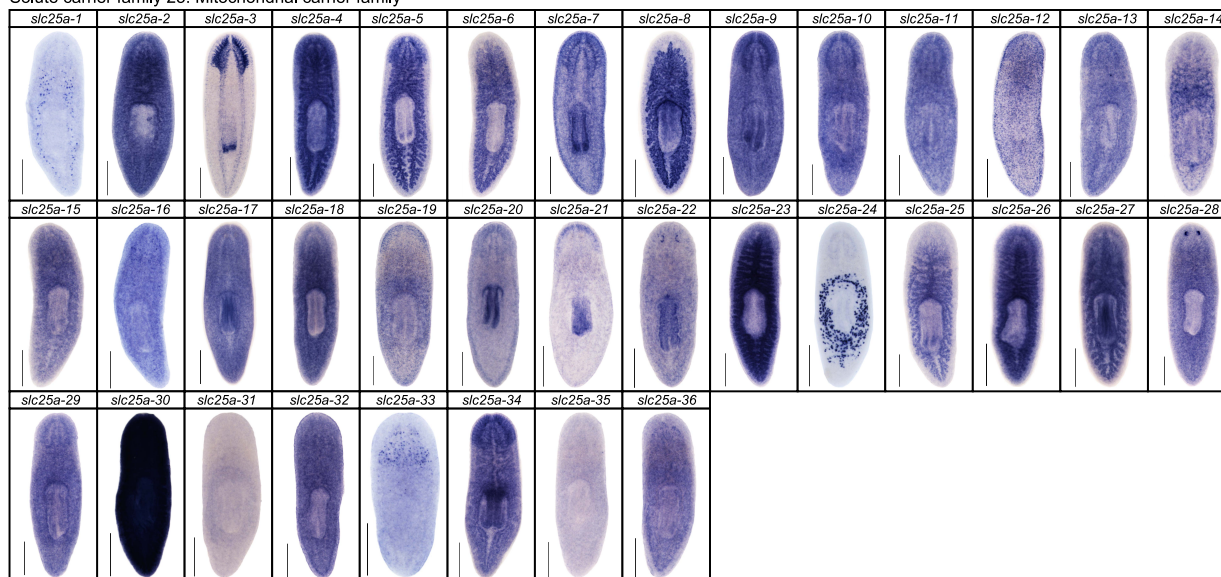

## Solute carrier family 26: Multifunctional anion exchanger family

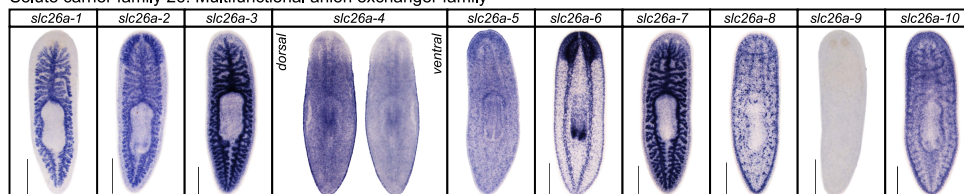

## Solute carrier family 27: Fatty acid transport protein family

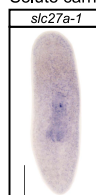Solute carrier family 28: Na<sup>+</sup>-coupled nucleoside transport family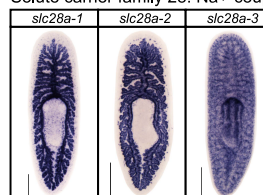

## Solute carrier family 29: Facilitative nucleoside transporter family

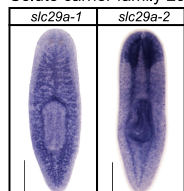

**Figure 2—figure supplement 11.** Expression patterns of *slc* genes that belong to solute carrier families 24–29 in an asexual strain of the planarian *S. mediterranea*. Whole-mount expression patterns of *slc* genes by in situ hybridization (NBT/BCIP development). Scale bars: 500  $\mu$ m.

DOI: [10.7554/eLife.07405.015](https://doi.org/10.7554/eLife.07405.015)

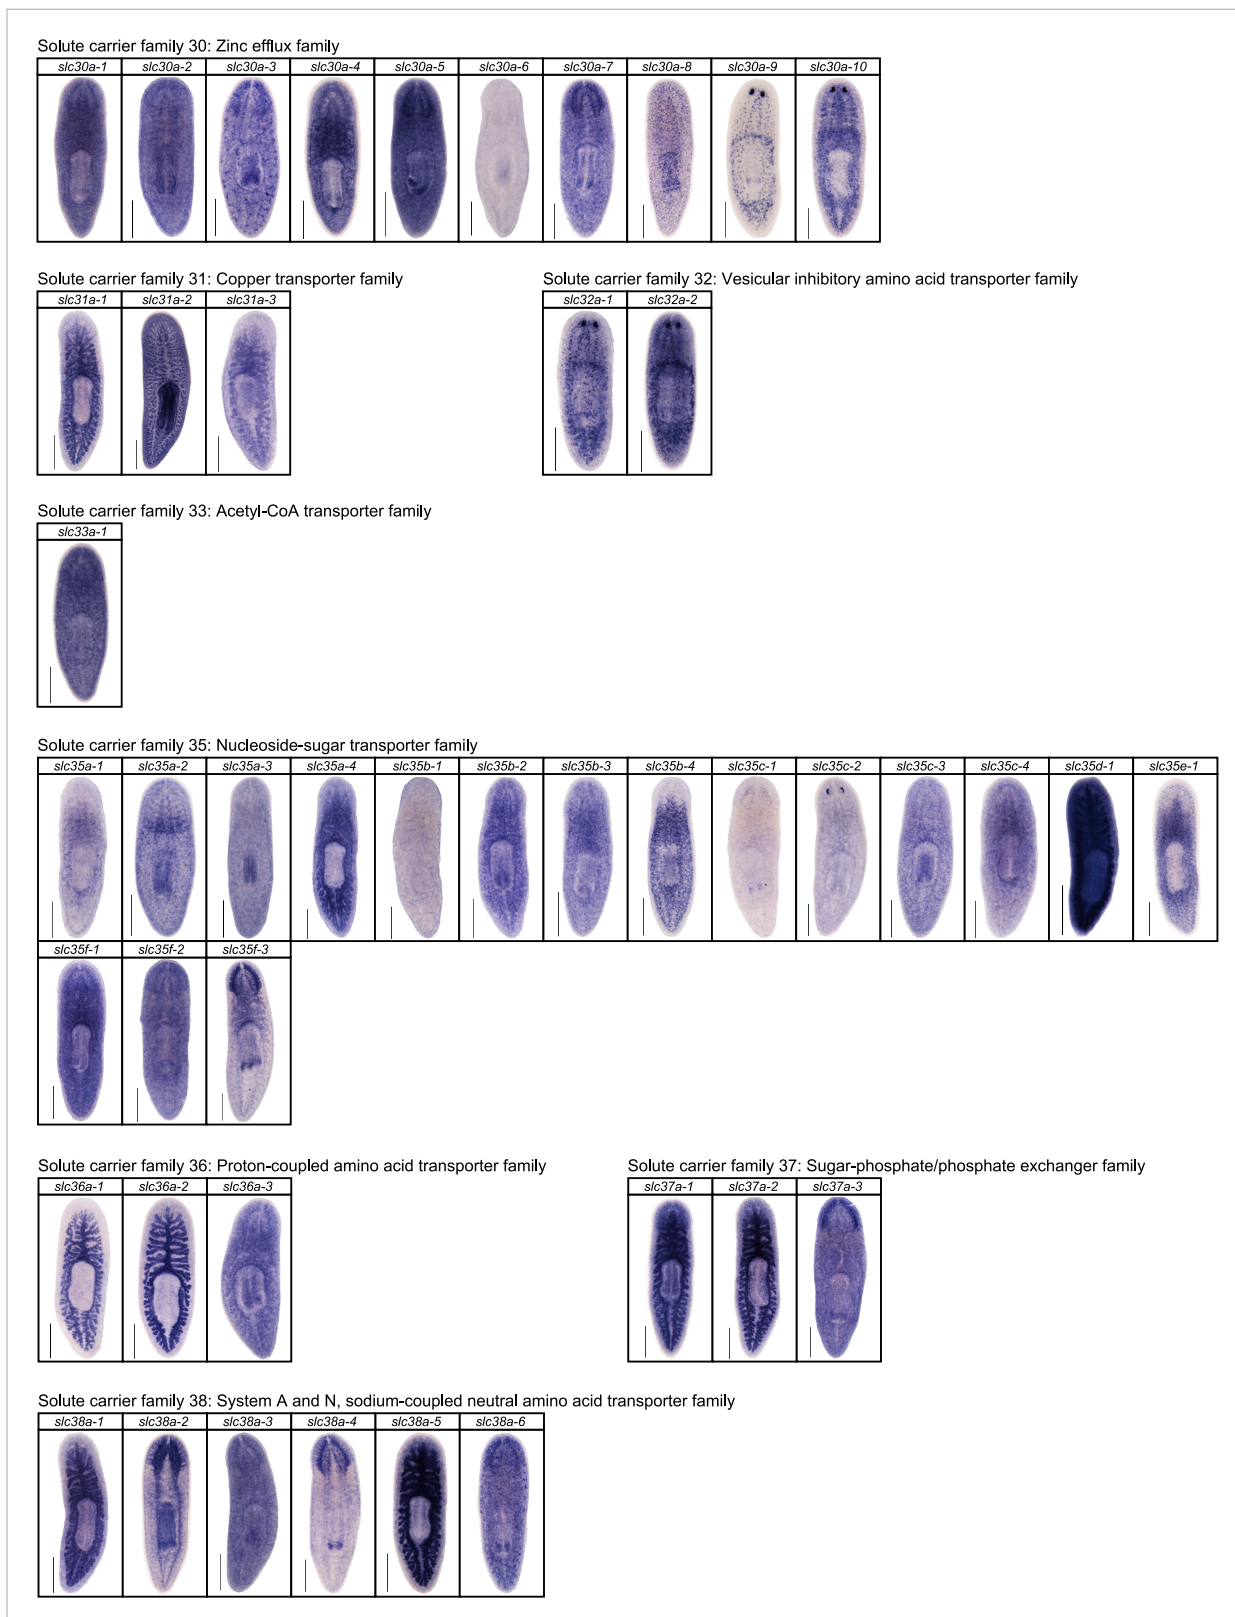

**Figure 2—figure supplement 12.** Expression patterns of *slc* genes that belong to solute carrier families 30–38 in an asexual strain of the planarian *S. mediterranea*. Whole-mount expression patterns of *slc* genes by in situ hybridization (NBT/BCIP development). Scale bars: 500  $\mu$ m.

DOI: [10.7554/eLife.07405.016](https://doi.org/10.7554/eLife.07405.016)



## Solute carrier family 39: Metal ion transporter family

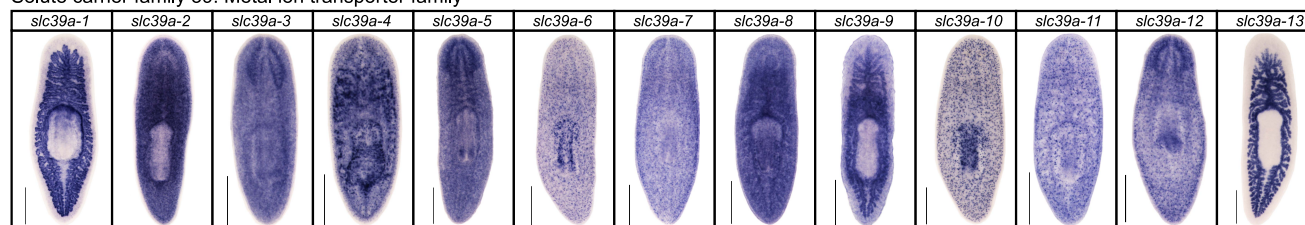

## Solute carrier family 40: Basolateral iron transporter family

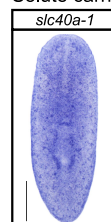

## Solute carrier family 41: MgtE-like magnesium transporter family

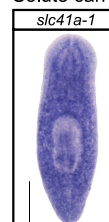

## Solute carrier family 42: Rhesus ammonium transporter family

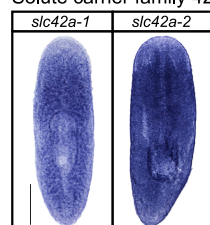Solute carrier family 43: Na<sup>+</sup>-independent, system-L-like amino acid transporter family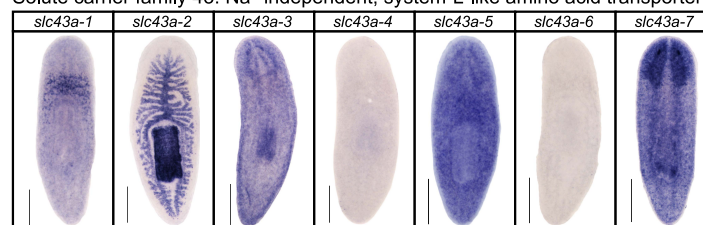

## Solute carrier family 44: Choline-like transporter family

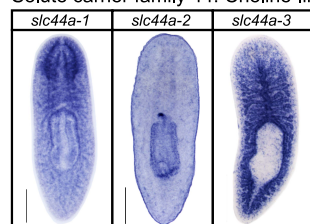

## Solute carrier family 46: Folate transporter family

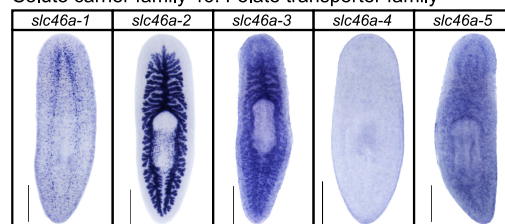

## Solute carrier family 47: Multidrug and toxin extrusion family

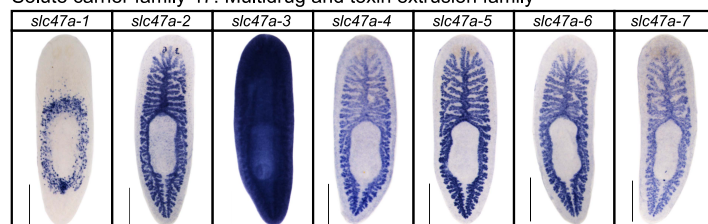

**Figure 2—figure supplement 13.** Expression patterns of *slc* genes that belong to solute carrier families 40–47 in an asexual strain of the planarian *S. mediterranea*. Whole-mount expression patterns of *slc* genes by in situ hybridization (NBT/BCIP development). Scale bars: 500  $\mu$ m.

DOI: [10.7554/eLife.07405.017](https://doi.org/10.7554/eLife.07405.017)



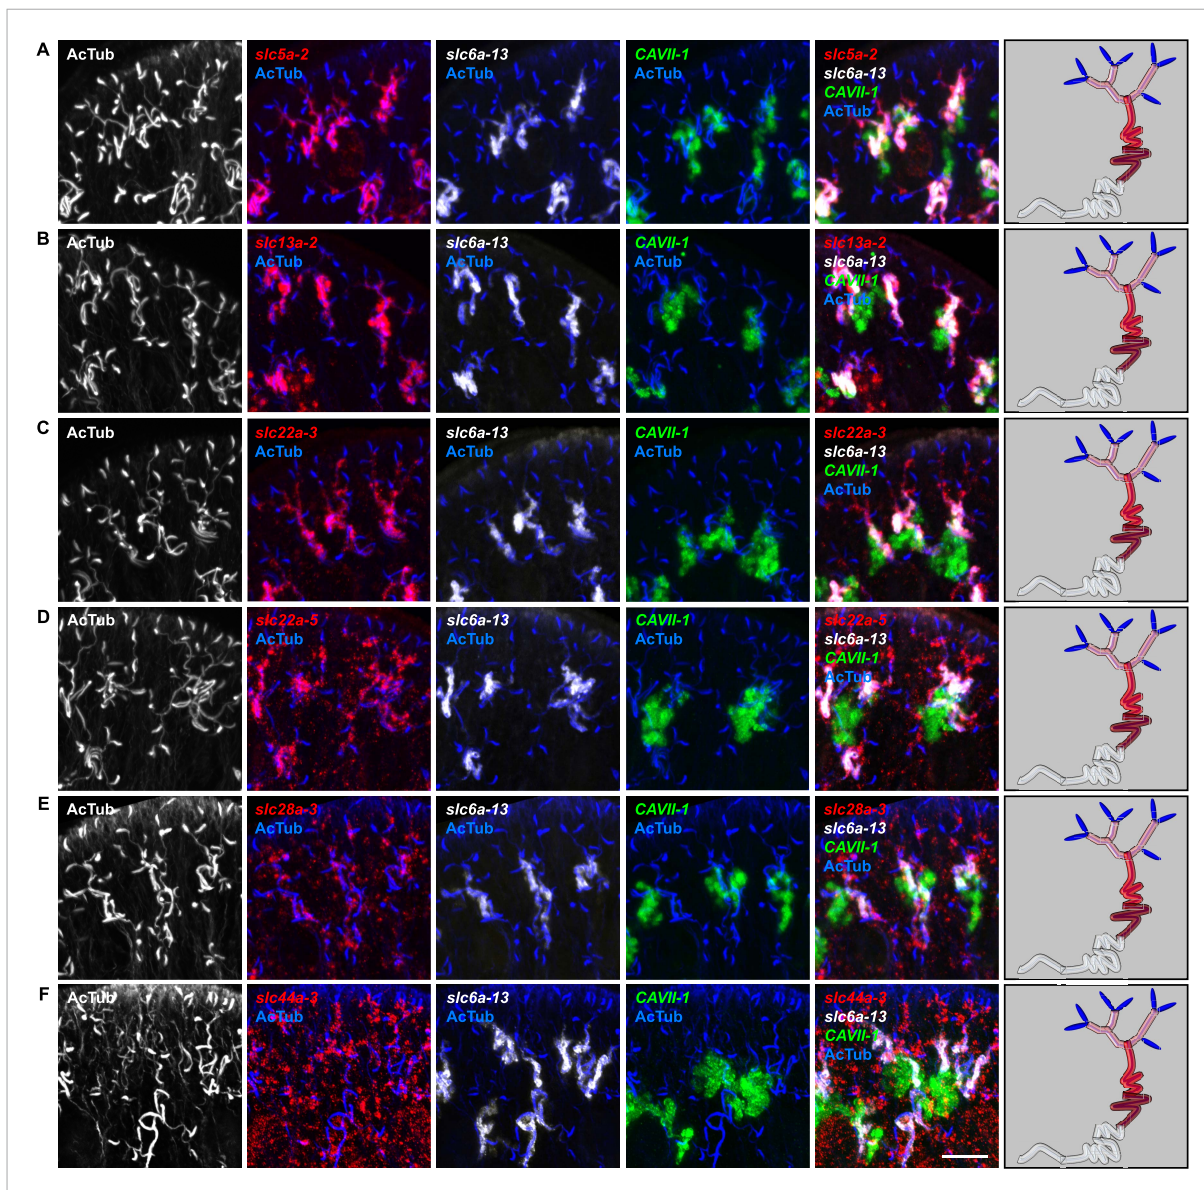

**Figure 2—figure supplement 14.** Expression of *slc* genes in the PT. Fluorescent overlay of indicated gene (in red) (A-F) with PT2 and PT3 marker (*slc6a-13*), DT marker (*CAVII-1*) and AcTub staining. Images are maximum projections of confocal Z-sections. Scale bars: 50  $\mu$ m. A color-coded scheme of protonephridial tubule at the end of each panel represents the expression domain of the indicated gene.

DOI: [10.7554/eLife.07405.018](https://doi.org/10.7554/eLife.07405.018)

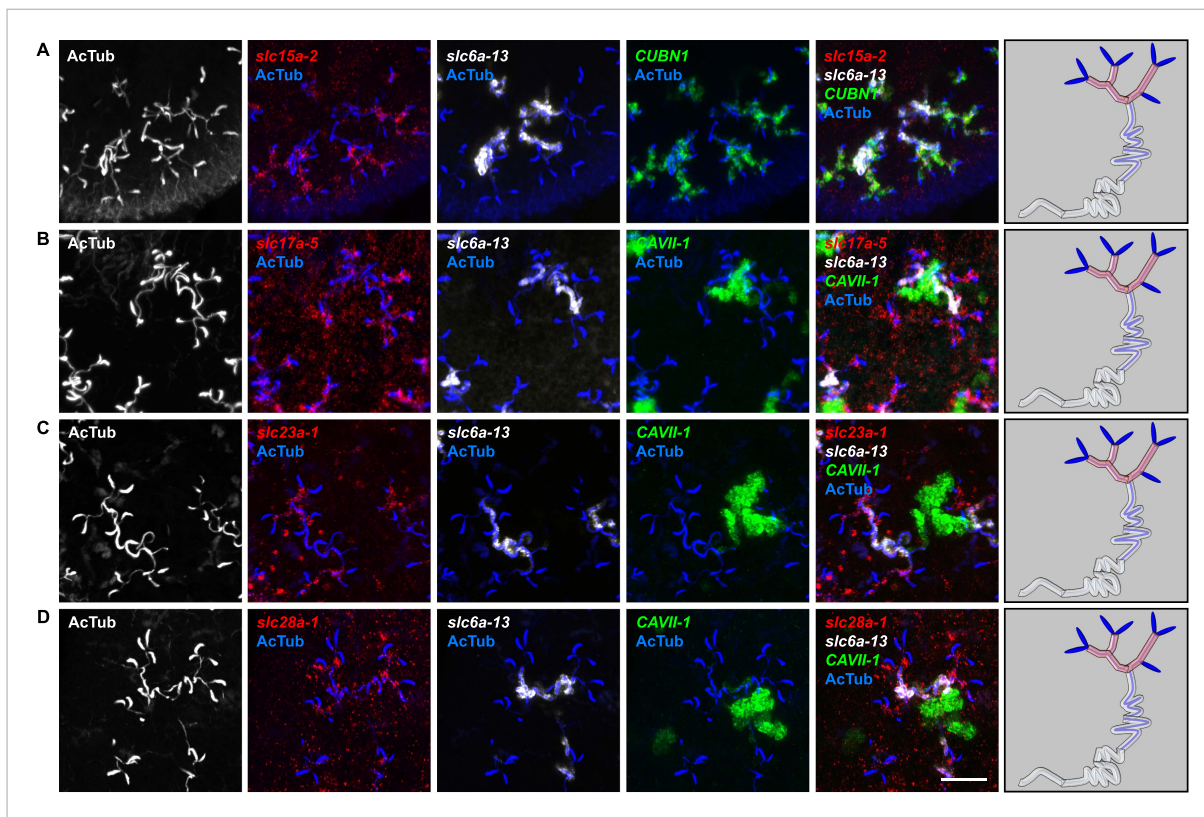

**Figure 2—figure supplement 15.** Expression of *slc* genes in the PT1 segment of the PT. (A) Fluorescent overlay of indicated gene (in red) with PT1 and PT2 marker (*CUBN1*), PT2 and PT3 marker (*slc6a-13*) and AcTub staining. (B–D) Fluorescent overlay of indicated gene (in red) with PT2 and PT3 marker (*slc6a-13*), DT marker (*CAVII-1*) and AcTub staining. Images are maximum projections of confocal Z-sections. Scale bars: 50 μm. A color-coded scheme of protonephridial tubule at the end of each panel represents the expression domain of the indicated gene.

DOI: [10.7554/eLife.07405.019](https://doi.org/10.7554/eLife.07405.019)



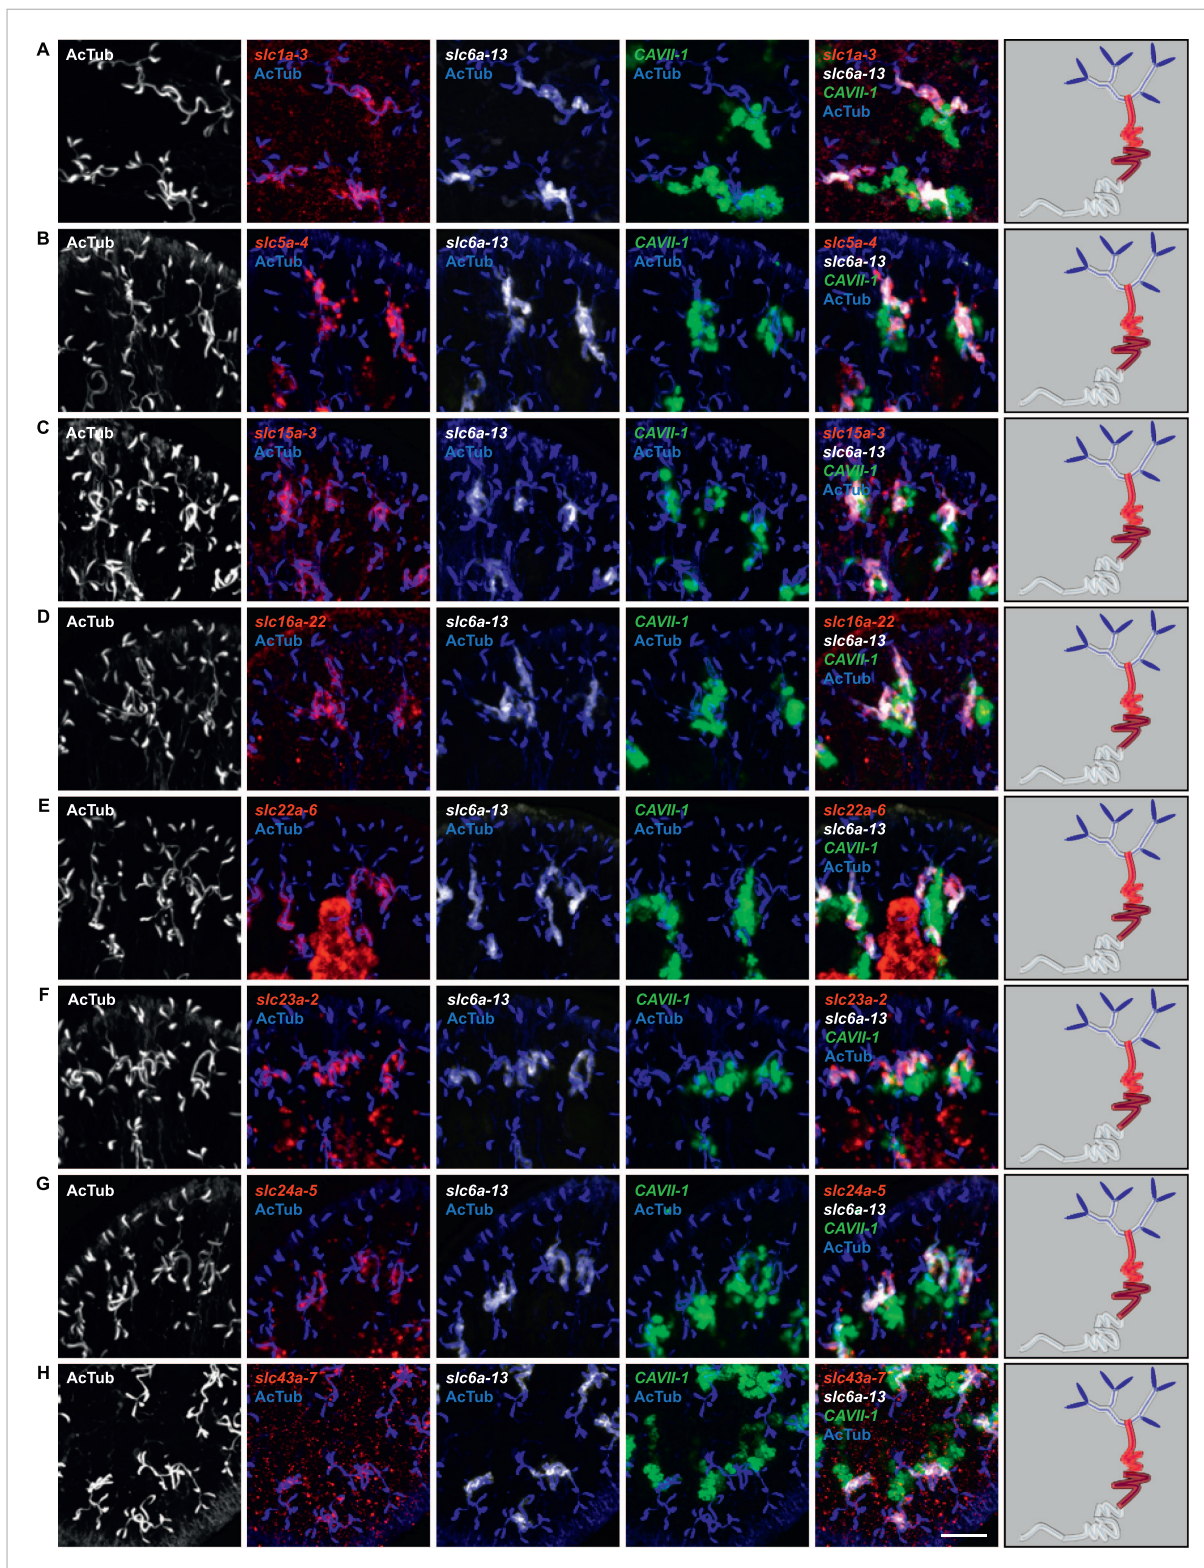

**Figure 2—figure supplement 16.** Expression of *slc* genes in the PT2 and PT3 segments of the PT. Fluorescent overlay of indicated gene (in red) with PT2 and PT3 marker (*slc6a-13*), DT marker (*CAVII-1*) and AcTub staining. Images are maximum projections of confocal Z-sections. Scale bars: 50  $\mu$ m. A color-coded scheme of protonephridial tubule at the end of each panel represents the expression domain of the indicated gene.

DOI: [10.7554/eLife.07405.020](https://doi.org/10.7554/eLife.07405.020)

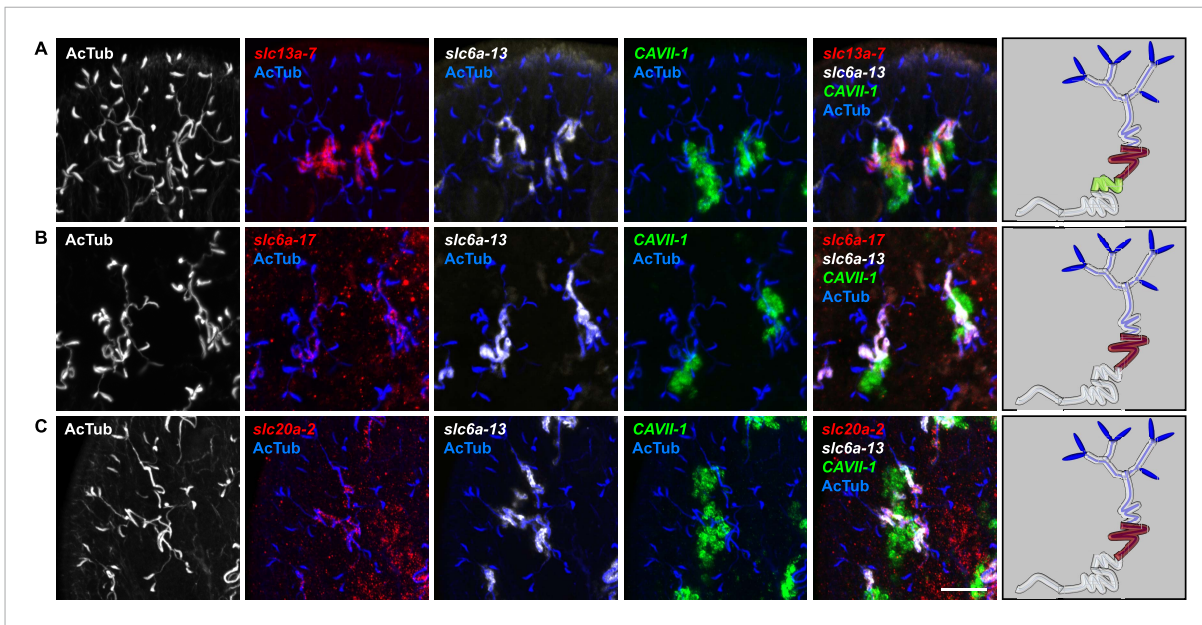

**Figure 2—figure supplement 17.** Expression of *slc* genes in PT3 segment of the PT. Fluorescent overlay of indicated gene (in red) (**A-C**) with PT2 and PT3 marker (*slc6a-13*), DT marker (*CAVII-1*) and AcTub staining. Images are maximum projections of confocal Z-sections. Scale bars: 50  $\mu$ m. A color-coded scheme of protonephridial tubule at the end of each panel represents the expression domain of the indicated gene.

DOI: [10.7554/eLife.07405.021](https://doi.org/10.7554/eLife.07405.021)



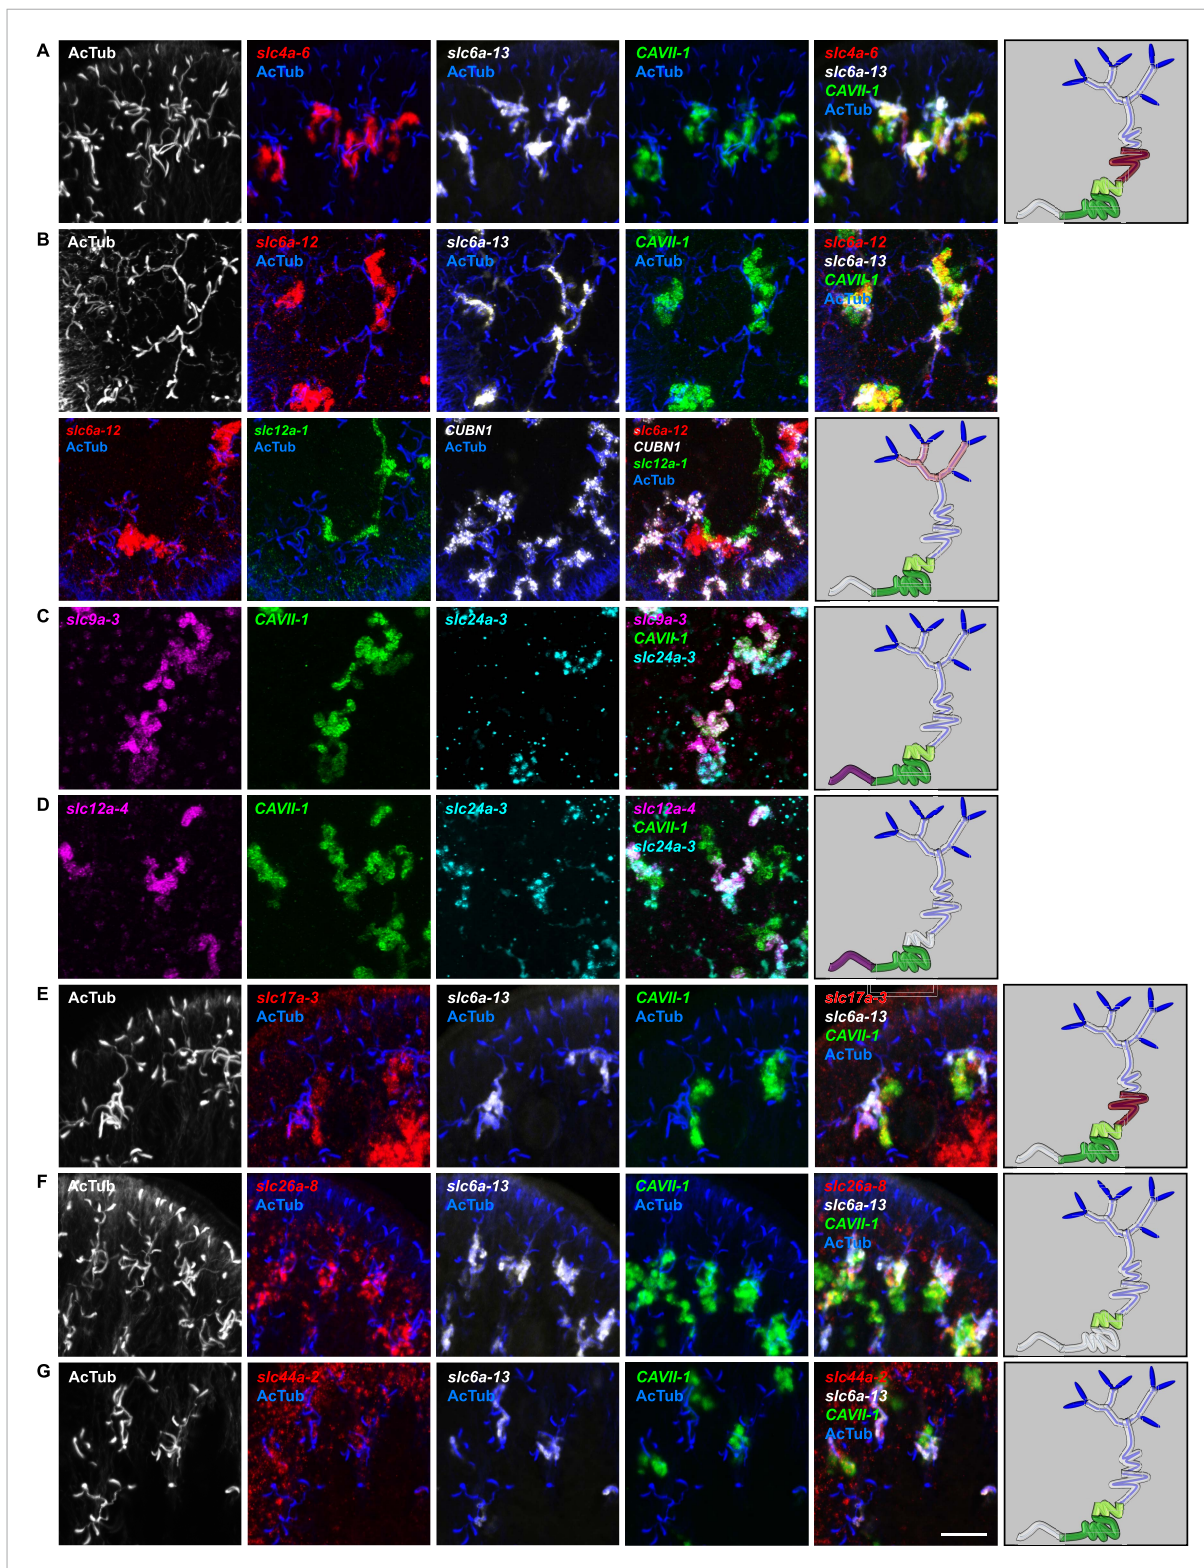

**Figure 2—figure supplement 18.** Expression of *slc* genes in the DT. Fluorescent overlay of indicated gene (in red) (A-G) with PT marker (*slc6a-13* or *CUBN1*), DT marker (*CAVII-1*) or CD marker (*slc12a-1* or *slc24a-3*) together with AcTub staining. Images are maximum projections of confocal Z-sections. Scale bars: 50 μm. A color-coded scheme of protonephridial tubule at the end of each panel represents the expression domain of the indicated gene.  
DOI: [10.7554/eLife.07405.022](https://doi.org/10.7554/eLife.07405.022)



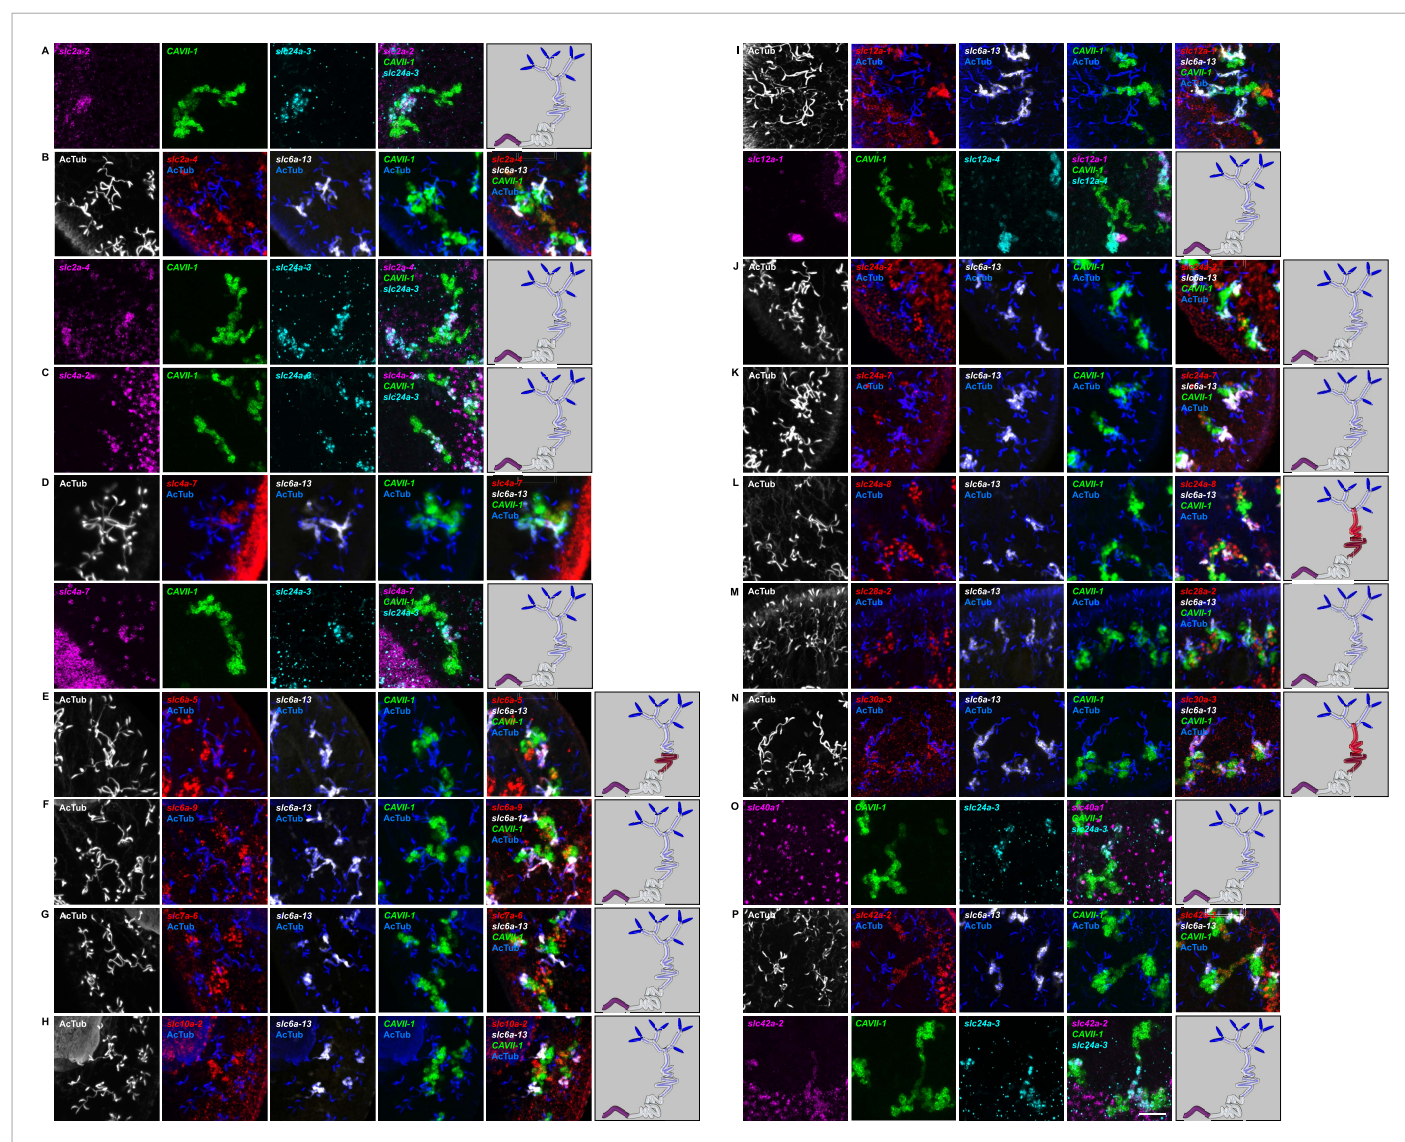

**Figure 2—figure supplement 19.** Expression of *slc* genes in the collecting duct. Fluorescent overlay of indicated gene (in red) (A-P) with PT2 and PT3 marker (*slc6a-13*), DT marker (CAVII-1) or CD marker (*slc24a-9*) together with AcTub staining. Images are maximum projections of confocal Z-sections. Scale bars: 50  $\mu$ m. A color-coded scheme of protonephridial tubule at the end of each panel represents the expression domain of the indicated gene. DOI: [10.7554/eLife.07405.023](https://doi.org/10.7554/eLife.07405.023)

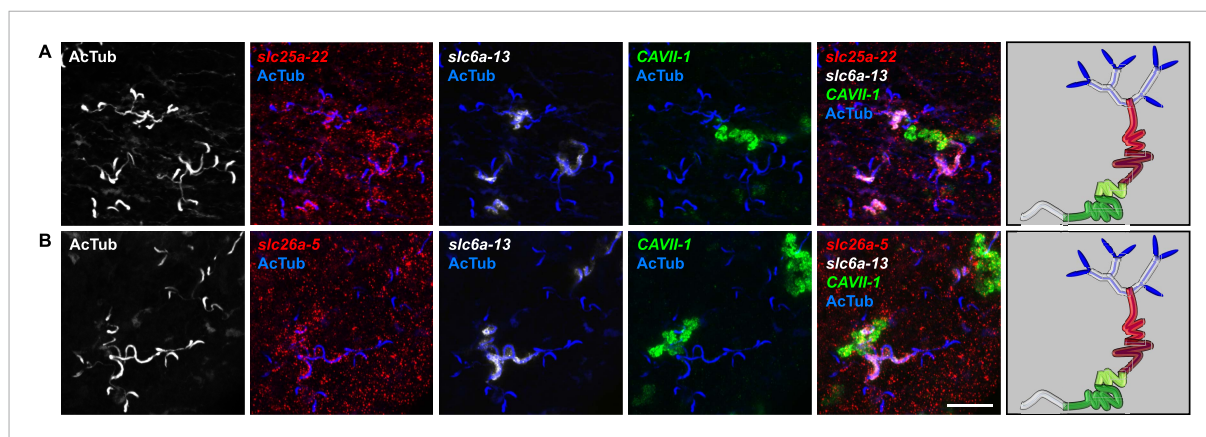

**Figure 2—figure supplement 20.** Expression of *slc* genes weakly expressed in both proximal and DTs. Fluorescent overlay of indicated gene (in red) (A-B) with PT2 and PT3 marker (*slc6a-13*), DT marker (*CAVII-1*) and AcTub staining. Images are maximum projections of confocal Z-sections. Scale bars: 50  $\mu$ m. A color-coded scheme of protonephridial tubule at the end of each panel represents the expression domain of the indicated gene.

DOI: [10.7554/eLife.07405.024](https://doi.org/10.7554/eLife.07405.024)

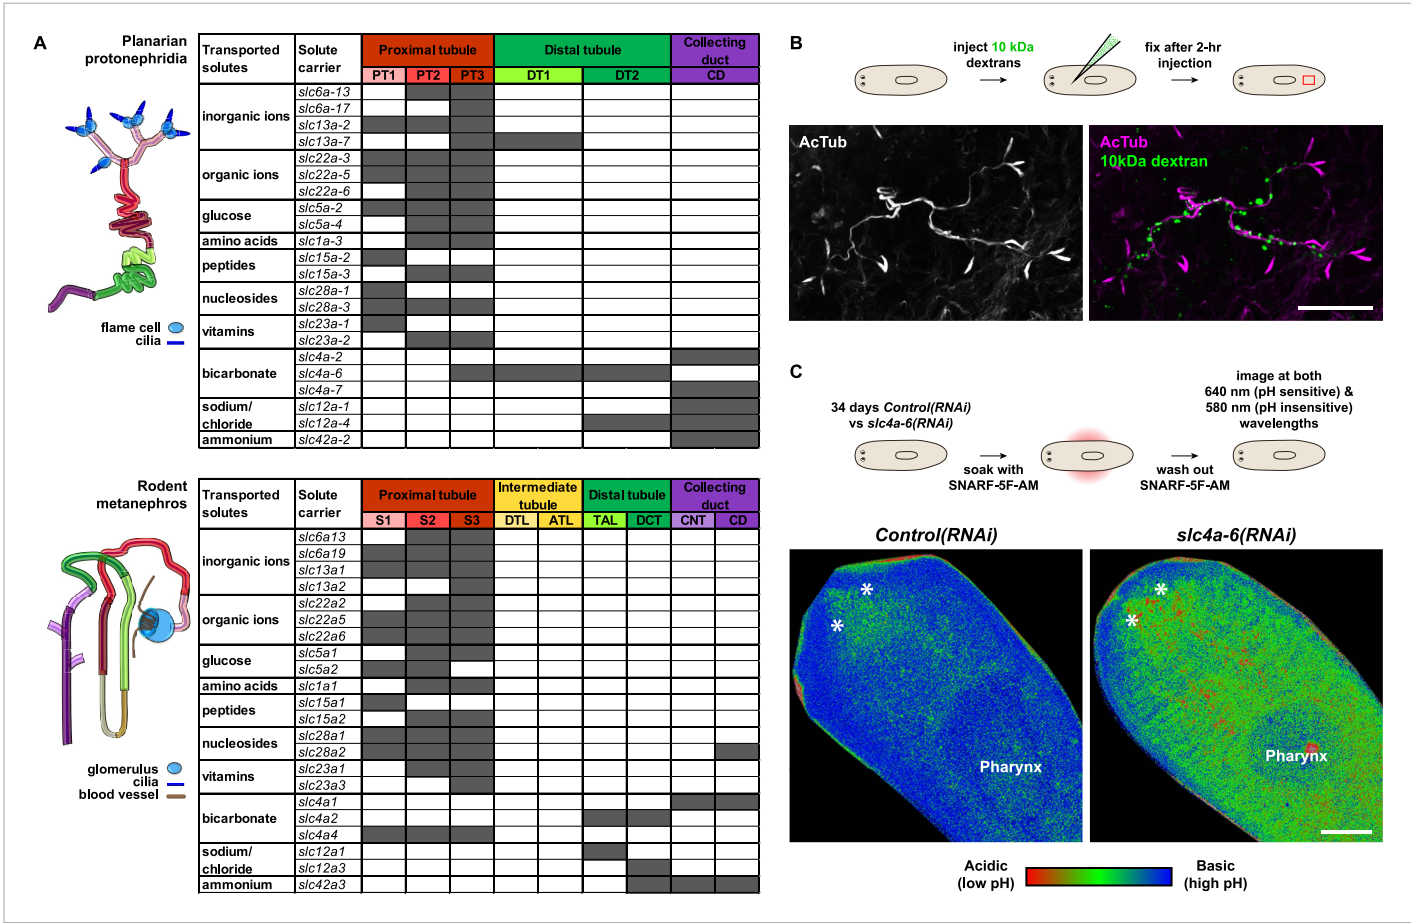

**Figure 3.** Extensive structural and functional homology between planarian protonephridia and vertebrate nephrons. **(A)** Tables summarize expression domains of selected *slc* genes in planarian protonephridia and rodent metanephros. Cartoons showing segmental organization of planarian protonephridia and rodent metanephros are on the left. Gray color in the tables indicates expression domain of *slc* in planarian protonephridia and rodent metanephros. Planarian *slc* sequence nomenclature (e.g., *slc1a-3*) doesn't reflect direct orthology to the mammalian counterparts. Abbreviations for segments of protonephridia are as follows: PT1, PT2, and PT3, segments of the proximal tubule (PT); DT1 and DT2, segments of the DT; CD, the collecting duct. Abbreviations for segments of the metanephros are as follows: S1, S2, and S3, segments of the PT; DTL, descending thin limb; ATL, ascending thin limb; TAL, thick ascending limb; DCT, distal convoluted tubules; CNT, connecting tubule; CD, collecting duct. **(B)** Fluorescent overlay of reabsorbed dextran with PT marker (AcTub). **(C)** pH<sub>i</sub> reporter assay using SNARF-5F-AM in Control(RNAi) and *slc4a-6(RNAi)*.

DOI: 10.7554/eLife.07405.026



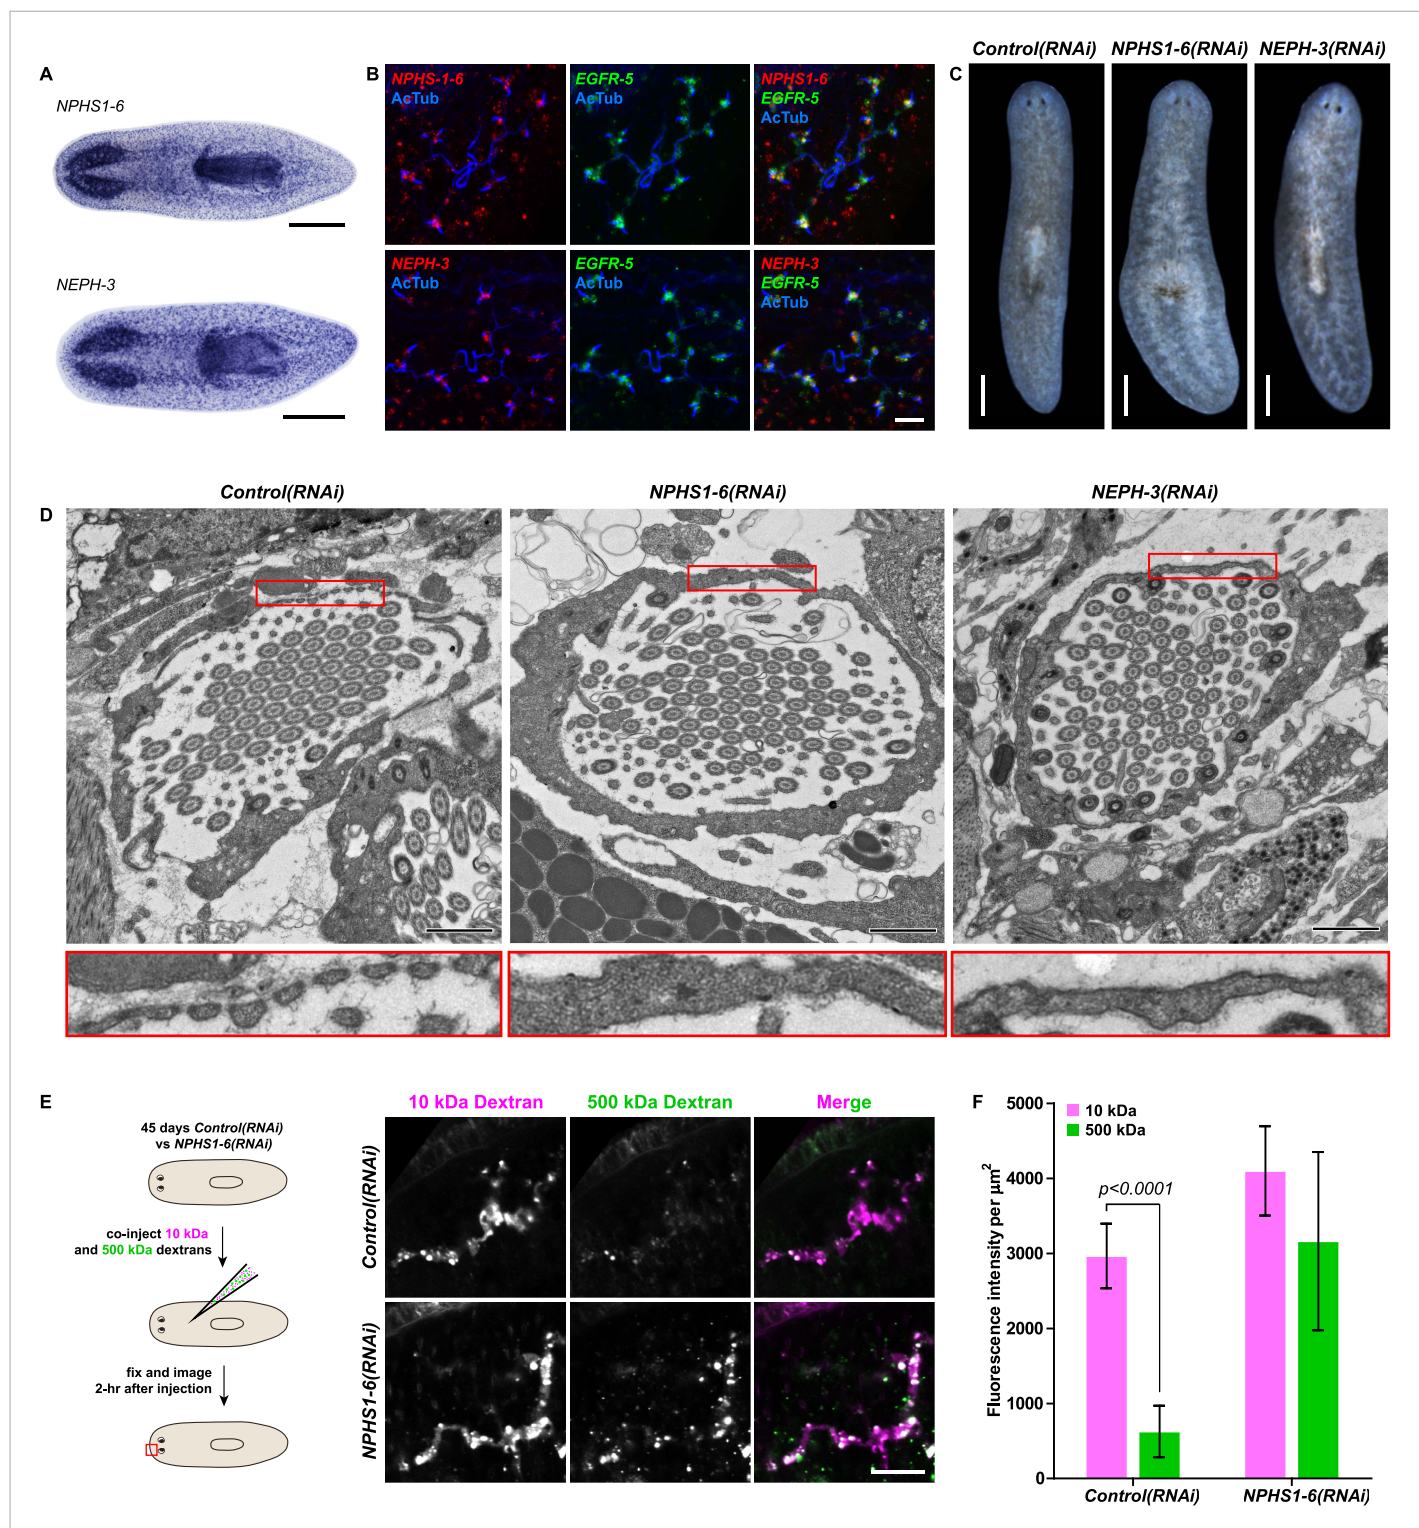

**Figure 4.** Vertebrate slit-diaphragm components are expressed in planarian flame cells and are required for the maintenance of their filtration diaphragm. (A) Whole-mount expression patterns of indicated marker genes by in situ hybridization (NBT/BCIP development). Scale bars: 500  $\mu$ m. (B) Fluorescent overlay of indicated gene (red) with flame cell marker *EGFR-5* and AcTub staining. Images are maximum projections of confocal Z-sections. Scale bars: 50  $\mu$ m. (C) Live images show edema in intact *NPHS1-6(RNAi)* and *NEPH-3(RNAi)* animals. Scale bars: 500  $\mu$ m. (D) TEM images show cross-section through a flame cell in intact *Control(RNAi)*, *NPHS1-6(RNAi)* and *NEPH-3(RNAi)* animals. Inset shows a high magnification of the filtration diaphragm. Scale bar: 1  $\mu$ m. (E, F) Ultrafiltration assay assesses the ultrafiltration capacity in *NPHS1-6(RNAi)* animals. (E) Representative images show dextran uptake in the animals that co-injected with 10 kDa and 500 kDa fluorescently labeled dextran. Scale bar: 50  $\mu$ m. (F) Quantification of small and large dextran uptake.

DOI: 10.7554/eLife.07405.027

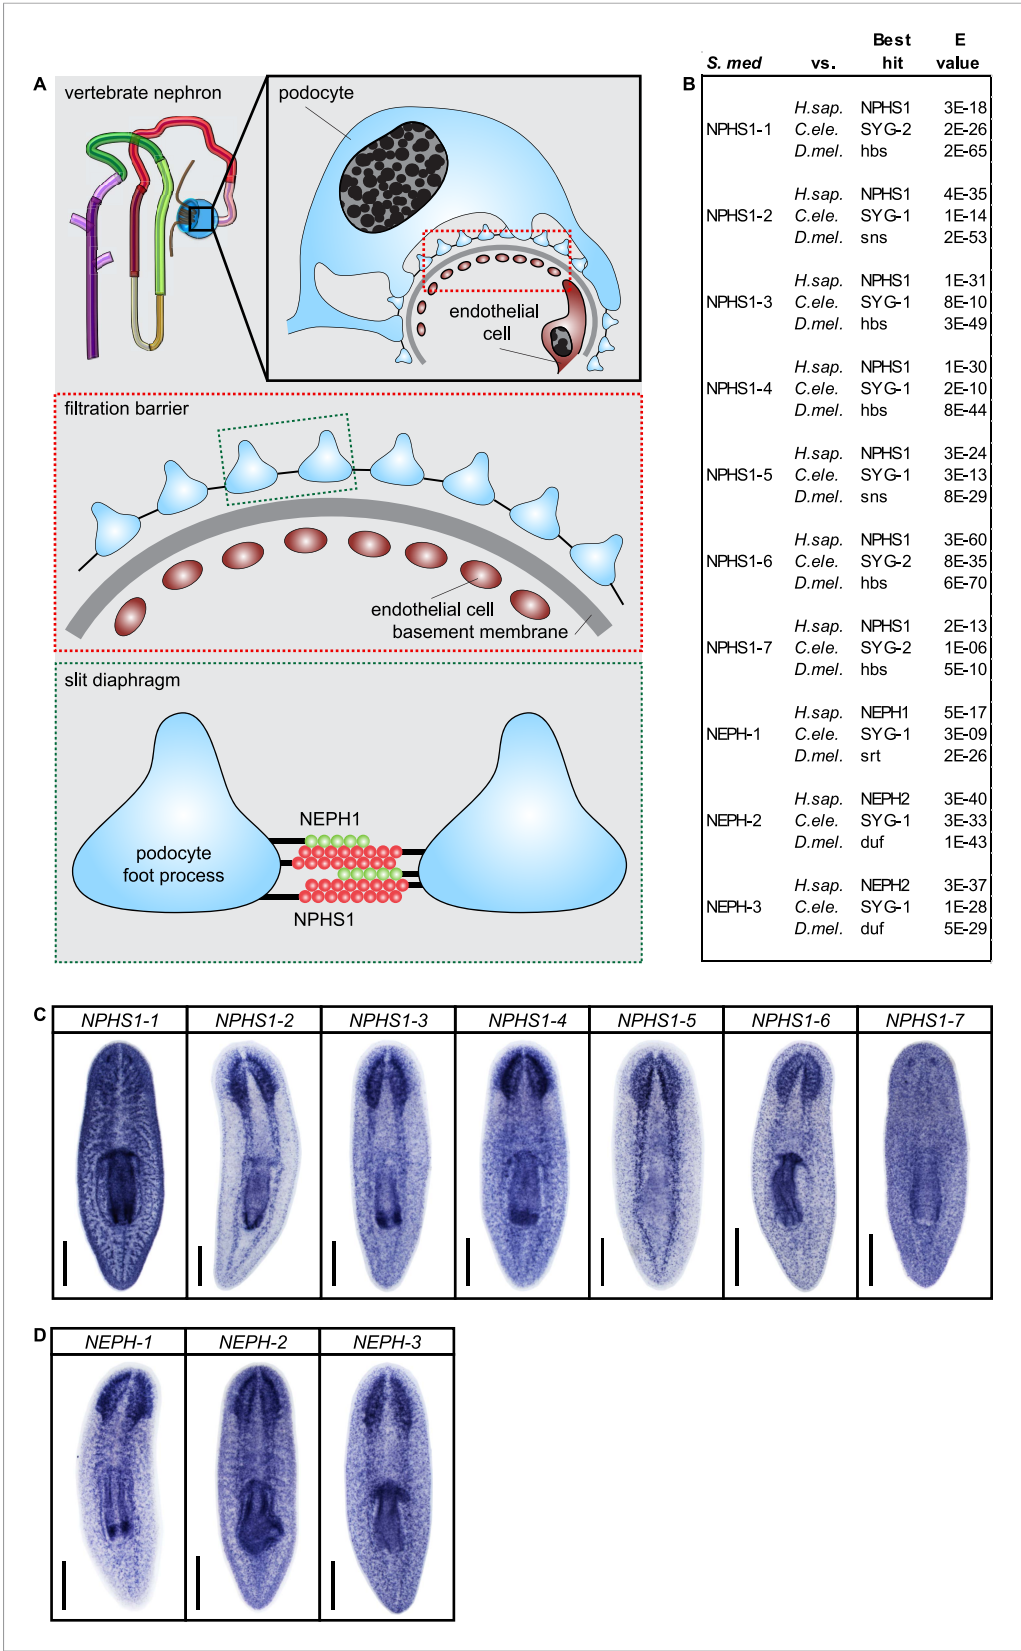

**Figure 4—figure supplement 1.** Slit-diaphragm components in the planarian *S. mediterranea*. (A) Cartoon showing Figure 4—figure supplement 1. continued on next page



*Figure 4—figure supplement 1. Continued*

the glomerular filtration barrier. Top: A schematic view of the podocyte. The podocyte wraps around the capillary wall on the outer surface of the glomerular basement membrane with its extended inter-digitating foot processes. Podocyte foot processes are then bridged by a slit diaphragm. Middle: A close-up view of the glomerular filtration barrier consisting of three components: porous endothelium, glomerular basement membrane, and podocyte foot processes with the interposed slit diaphragm. The endothelial pores are not bridged by a diaphragm. Bottom: Schematic drawing of the molecular equipment of slit diaphragm. NPHS1 undergoes homophilic interaction on neighboring podocyte foot processes. The intercellular junction also contains the adhesion molecule NEPH-1. **(B)** Homology analysis of the planarian homologs of NPHS1 and NEPH. Domains predicted by SMART for planarian and human proteins. Best reciprocal BLAST hits in human, *C. elegans*, and fly refseq protein database. **(C)** Whole-mount expression patterns of NPHS1 and **(D)** NEPH by in situ hybridization. Scale bars: 500  $\mu\text{m}$ .

DOI: [10.7554/eLife.07405.028](https://doi.org/10.7554/eLife.07405.028)

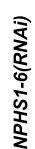

Figure 4—figure supplement 2. Continued

**Figure 4—figure supplement 2.** *NPHS1-6* is not required for flame cell viability during normal homeostasis, as well as regeneration. (A, B) Fluorescent overlay of flame cell markers (*CXCRL* and *EGFR-5*) with AcTub staining in intact (A) and regenerating (B) *Control(RNAi)* and *NPHS1-6(RNAi)*. Images are maximum projections of confocal Z-sections. Scale bars: 50  $\mu$ m.

DOI: [10.7554/eLife.07405.029](https://doi.org/10.7554/eLife.07405.029)

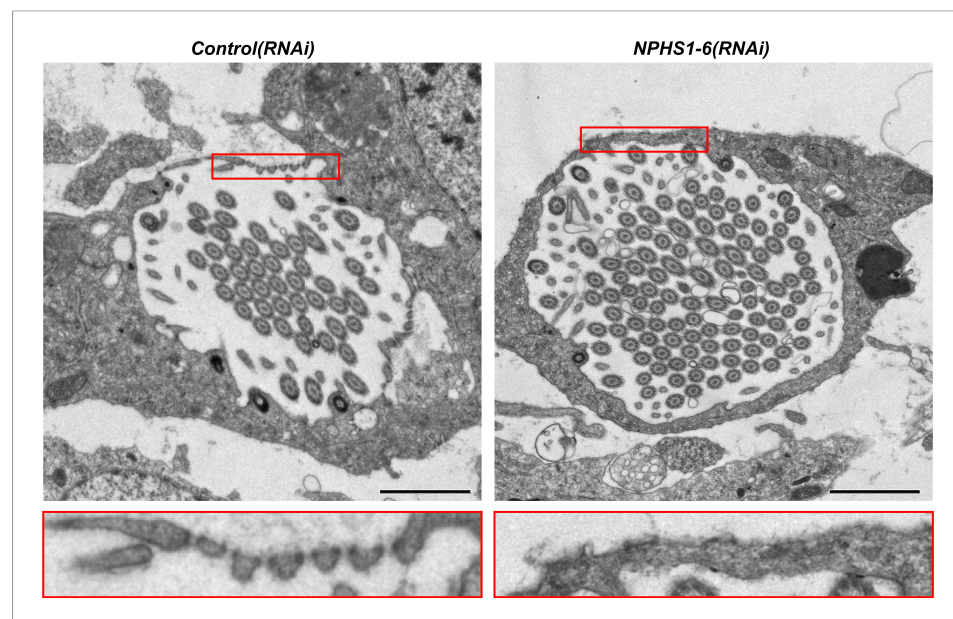

**Figure 4—figure supplement 3.** *NPHS1-6* is required for de novo formation of filtration diaphragm during regeneration. TEM images showing cross-section through a flame cell in regenerating *Control(RNAi)* and *NPHS1-6(RNAi)* animals. Inset shows high magnification of filtration diaphragm. Scale bar: 1  $\mu$ m.

DOI: [10.7554/eLife.07405.030](https://doi.org/10.7554/eLife.07405.030)

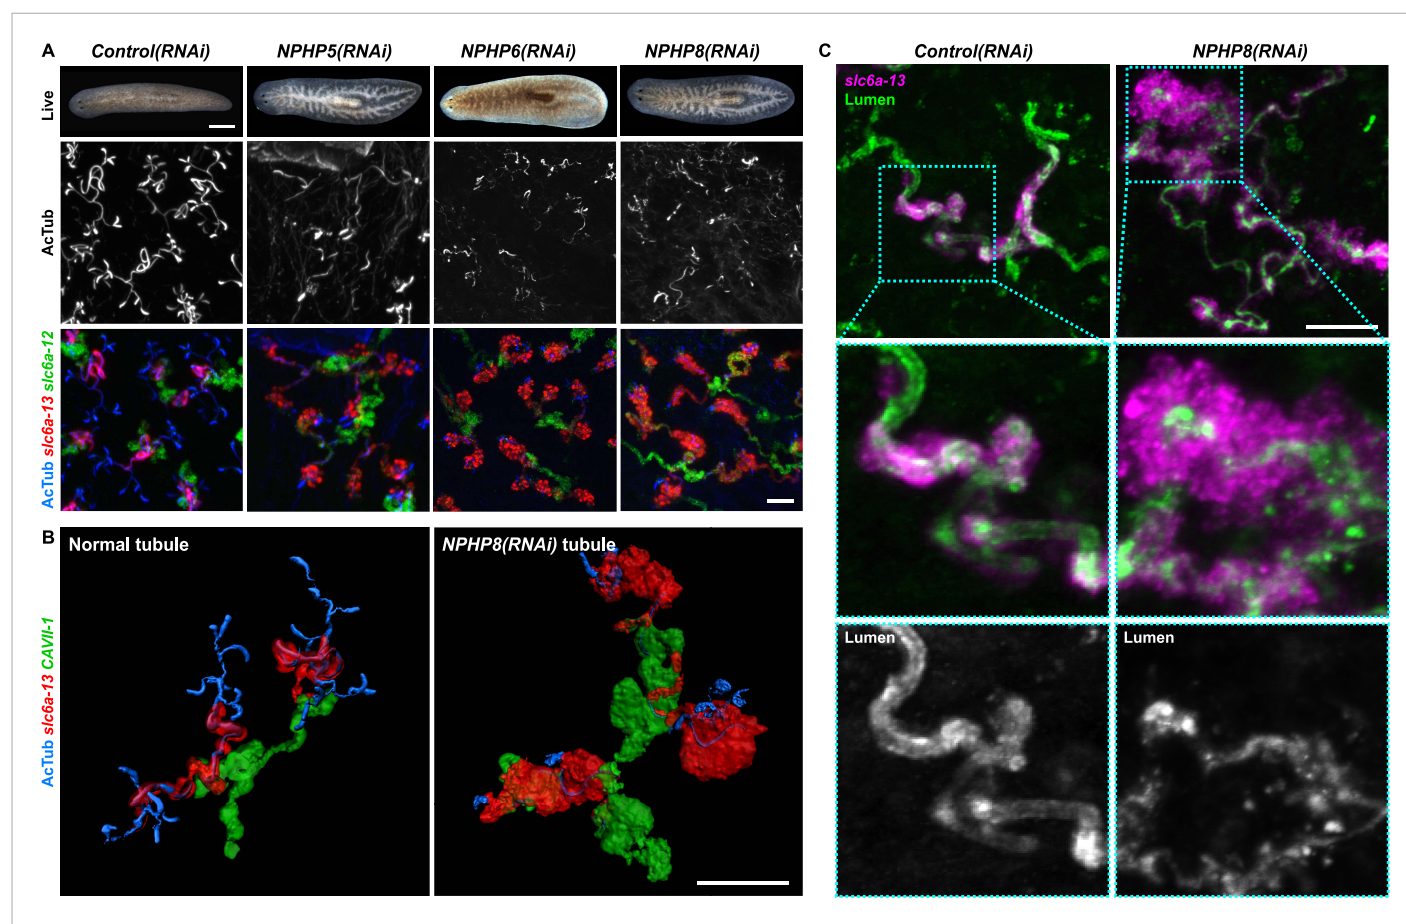

**Figure 5.** Down-regulation of nephrocystin members leads to the formation of cyst-like structure in protonephridia. **(A)** Protonephridial defects in *NPHP5* (RNAi), *NPHP6*(RNAi) and *NPHP8*(RNAi) animals. Top panel: live images show edema in intact RNAi animals. Scale bars: 500  $\mu$ m; middle panel: monochrome showing AcTub staining; bottom panel: fluorescent overlay of AcTub staining with PT2 and PT3 marker (*slc6a-13*) and DT marker (*slc6a-12*). Scale bars: 50  $\mu$ m. **(B)** 3D rendering images showing normal tubule and cystic-like tubule in *Control*(RNAi) and *NPHP8*(RNAi) animals, respectively. 3D rendering was performed in IMARIS. Scale bars: 50  $\mu$ m. **(C)** Fragmented lumen in enlarged protonephridial tubule. Fluorescent overlay of PT2 and PT3 marker *slc6a-13* and lumen marker (a customized rabbit antiserum recognized unknown epitope) in intact *Control*(RNAi) and *NPHP8*(RNAi) animals. Scale bars: 50  $\mu$ m. Images in **(A)** and **(C)** are maximum projections of confocal Z-sections.

DOI: [10.7554/eLife.07405.033](https://doi.org/10.7554/eLife.07405.033)



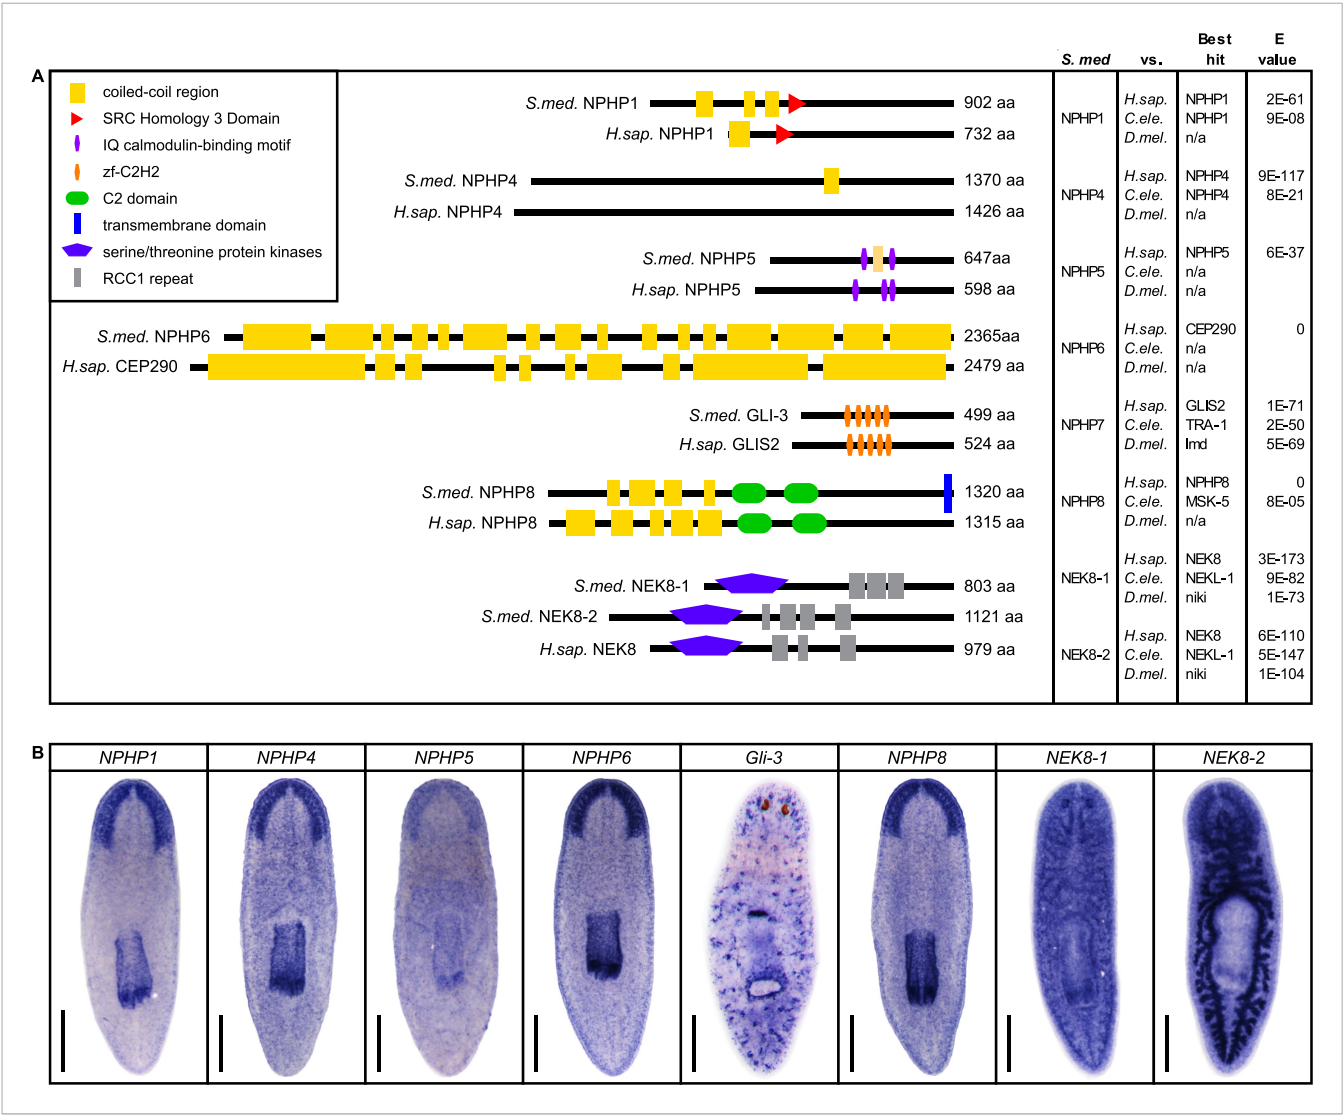



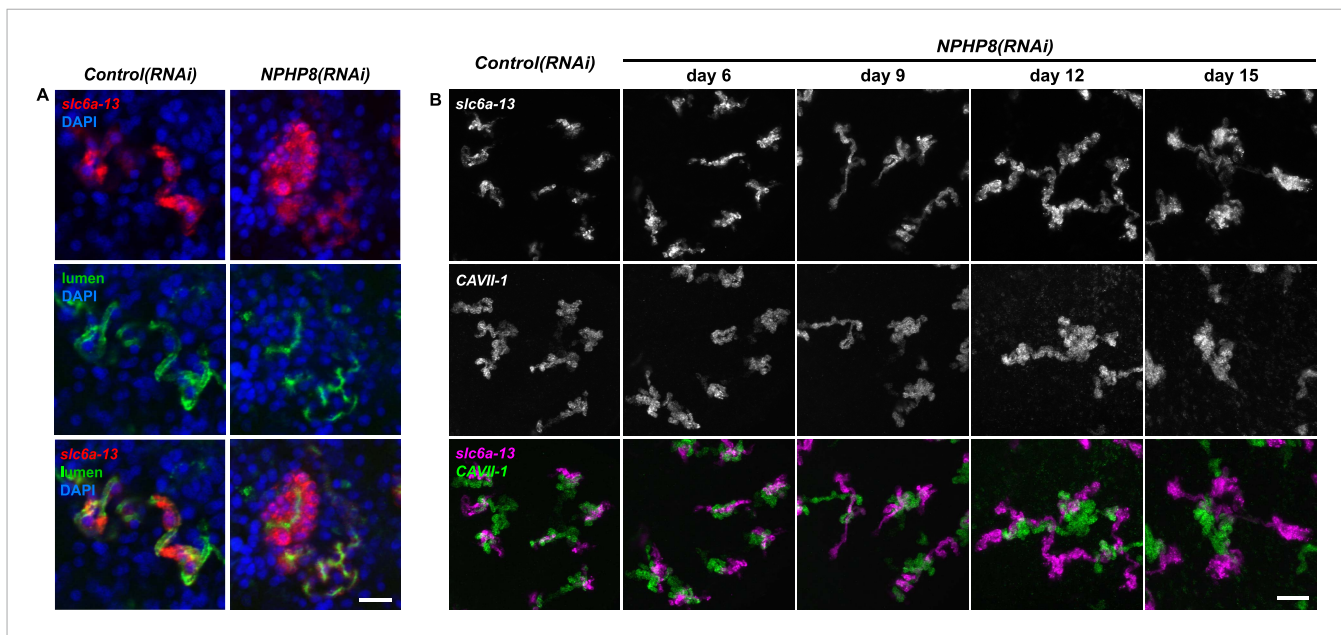

**Figure 5—figure supplement 2.** Abnormal tubular enlargement in *NPHP8(RNAi)* animals. (A) Fluorescent overlay of lumen marker with PT2 and PT3 marker *slc6a-13* and nuclei (DAPI) in *Control(RNAi)* and *NPHP8(RNAi)* animals. Scale bars: 25  $\mu$ m. (A) Fluorescent overlay of PT marker (*slc6a-13*) and (B) DT marker (CAVI-1) in intact *Control(RNAi)* and *NPHP8(RNAi)* animals. Images are maximum projections of confocal Z-sections. Scale bars: 50  $\mu$ m.

DOI: [10.7554/eLife.07405.035](https://doi.org/10.7554/eLife.07405.035)

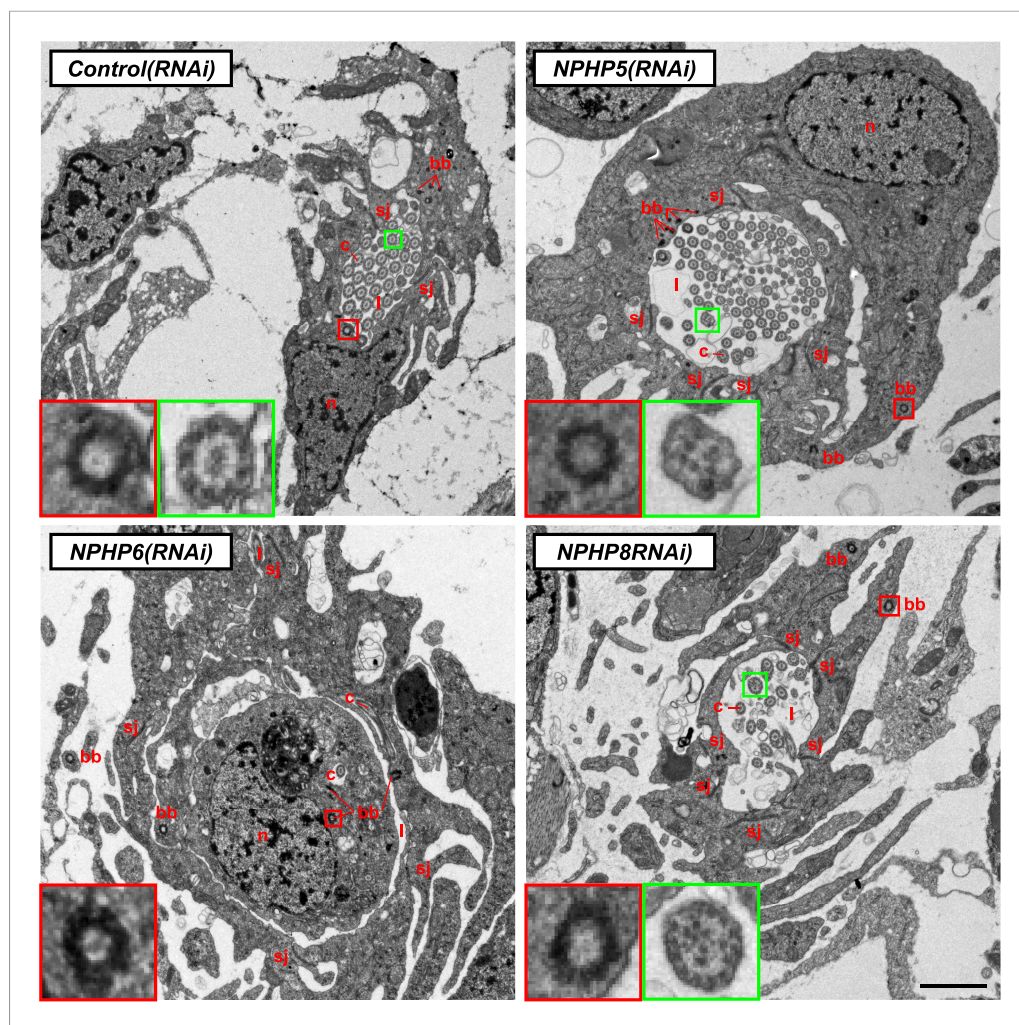

**Figure 5—figure supplement 3.** Ultrastructure of the PT in *NPHP(RNAi)* animals. TEM images showing cross-section through a tubule of protonephridia in indicated RNAi animals. Inset in red box shows abnormally localized basal body in indicated RNAi animals. Inset in green box shows ultrastructure of cilia. c, cilia; n, nucleus; bb, basal body; sj, septate junction; l, lumen.

DOI: [10.7554/eLife.07405.036](https://doi.org/10.7554/eLife.07405.036)

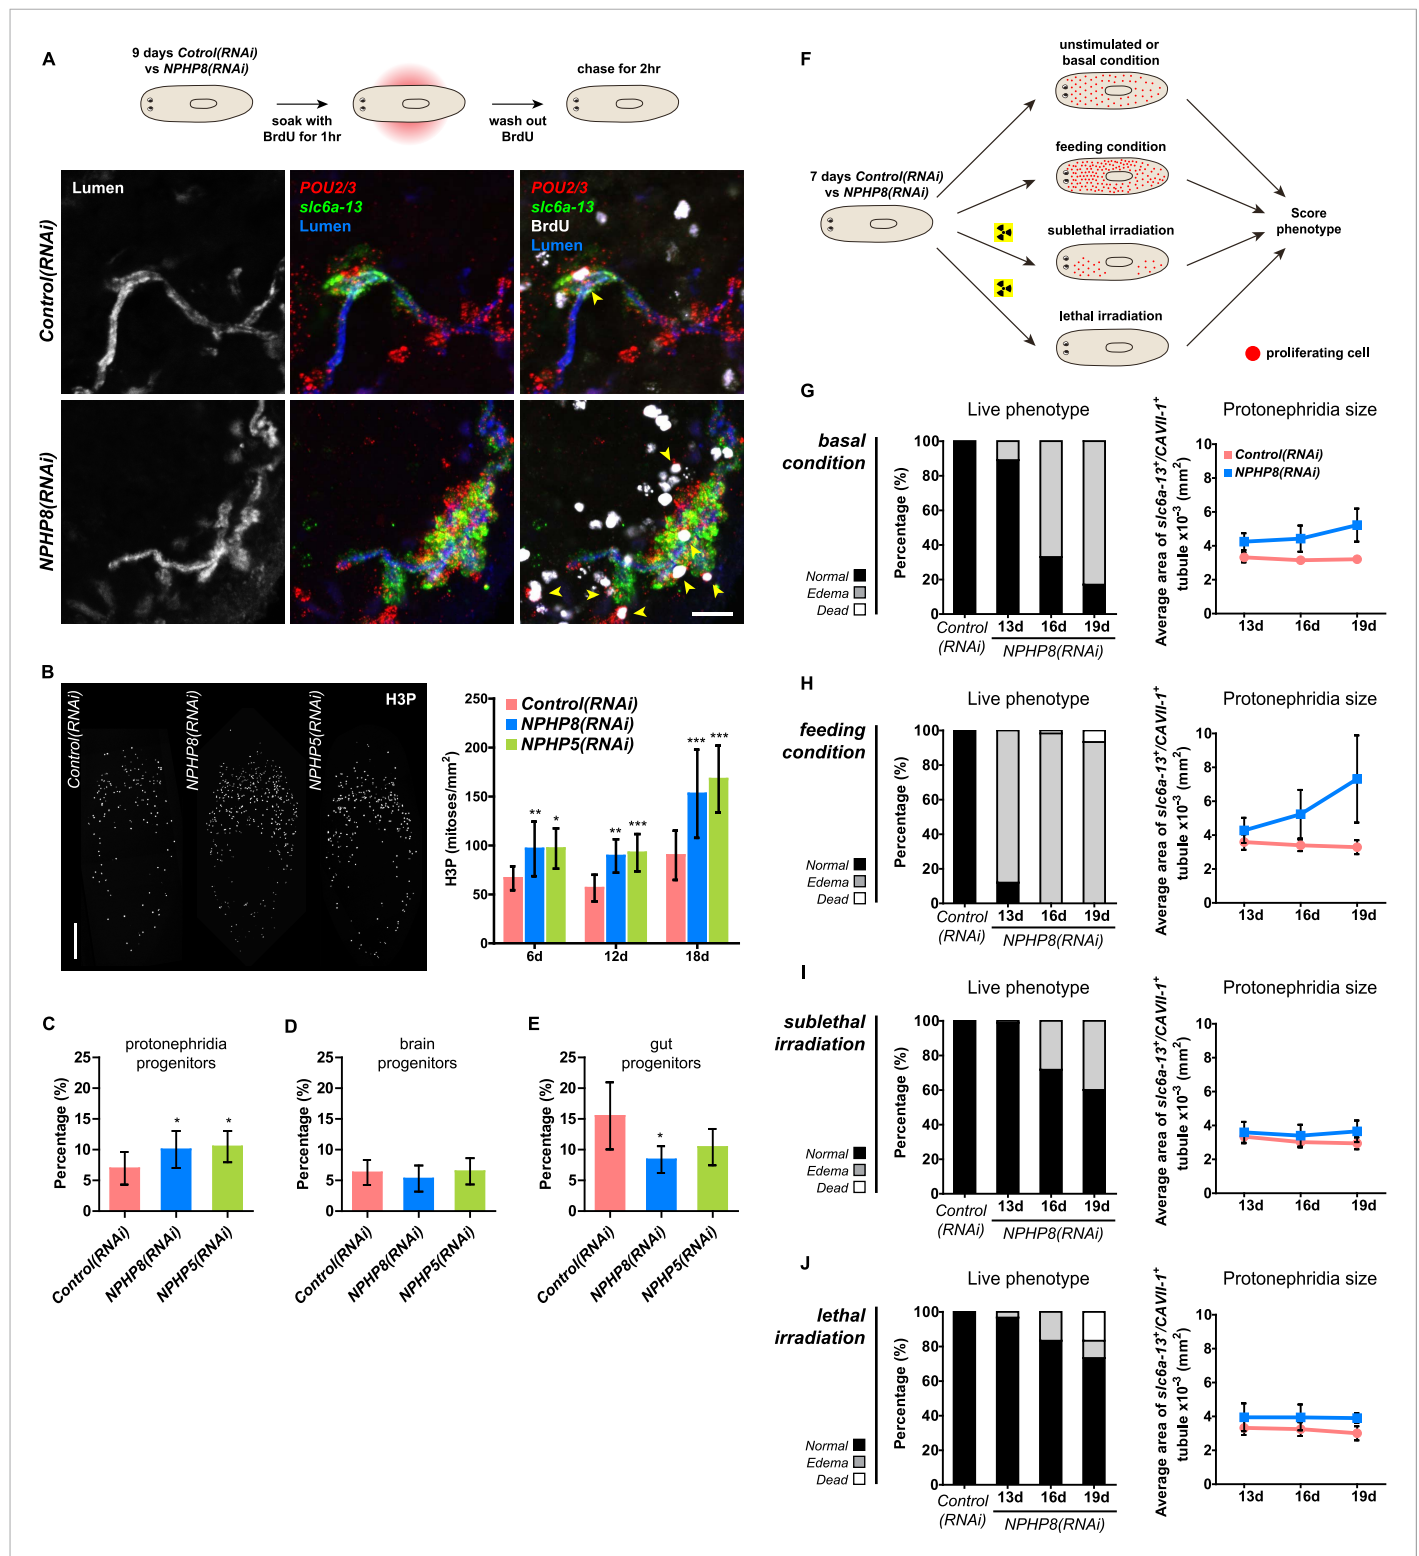

**Figure 6.** Cystogenesis in planarian protonephridia results from direct proliferation of protonephridia progenitors and requires the presence of stem cells. (A) BrdU pulse-chase experiment shows the presence of diving protonephridial progenitors in the proximity of protonephridial tubule in *Control(RNAi)* and *NPHP8(RNAi)* animals. Yellow arrowhead indicates *POU2/3*<sup>+</sup>/BrdU<sup>+</sup> cell. Scale bars: 25  $\mu$ m. (B) Increased global proliferation in *NPHP5(RNAi)* and *NPHP8(RNAi)* animals is displayed by immunostaining of mitotic marker phospho-Histone H3 (H3P). Scale bars: 500  $\mu$ m. \*  $p < 0.05$ ; \*\*  $p < 0.01$ ; \*\*\*  $p < 0.001$  vs control. The time points in the bar graph indicate the number of day after the last dsRNA introduction. (C–E) Quantification of (C) dividing protonephridial progenitors (*POU2/3*<sup>+</sup>/H3P<sup>+</sup>), (D) diving neuronal progenitors (*pax6A*<sup>+</sup>/H3P<sup>+</sup>) and (E) diving gut progenitors (*HNF4*<sup>+</sup>/H3P<sup>+</sup>) among diving Figure 6. continued on next page

## Figure 6. Continued

cells (H3P<sup>+</sup>) in indicated RNAi animals at 18 day after last RNAi introduction. \*  $p < 0.05$  vs control. **(F–J)** Effect of proliferation and the requirement of neoblasts on cyst formation in planarian protonephridia. **(F)** Schematic demonstrates experimental strategy for panel **H–J**. 7 day post RNAi feeding animals were either fed with liver to induce cell proliferation or subjected to sublethal or lethal doses of irradiation to reduce or eliminate neoblasts. Scoring live phenotype as well as measuring the average size of each protonephridial unit was used to evaluate the severity of cystic phenotype. Temporal succession of indicated phenotypes (left) and quantification of average area of each *slc6a13*<sup>+</sup>/*CAVII*-1<sup>+</sup> tubule (right) in *Control*(RNAi) and *NPHP8*(RNAi) animals under **(G)** basal condition (only RNAi feeding), **(H)** basal condition plus extra feeding with liver, **(I)** basal condition plus sub-lethal irradiation to reduce the number of neoblasts, and **(J)** basal condition plus lethal irradiation to completely eliminate neoblasts. The time points in the bar graphs **(G–J)** indicate the number of the day after the first dsRNA introduction.

DOI: [10.7554/eLife.07405.039](https://doi.org/10.7554/eLife.07405.039)



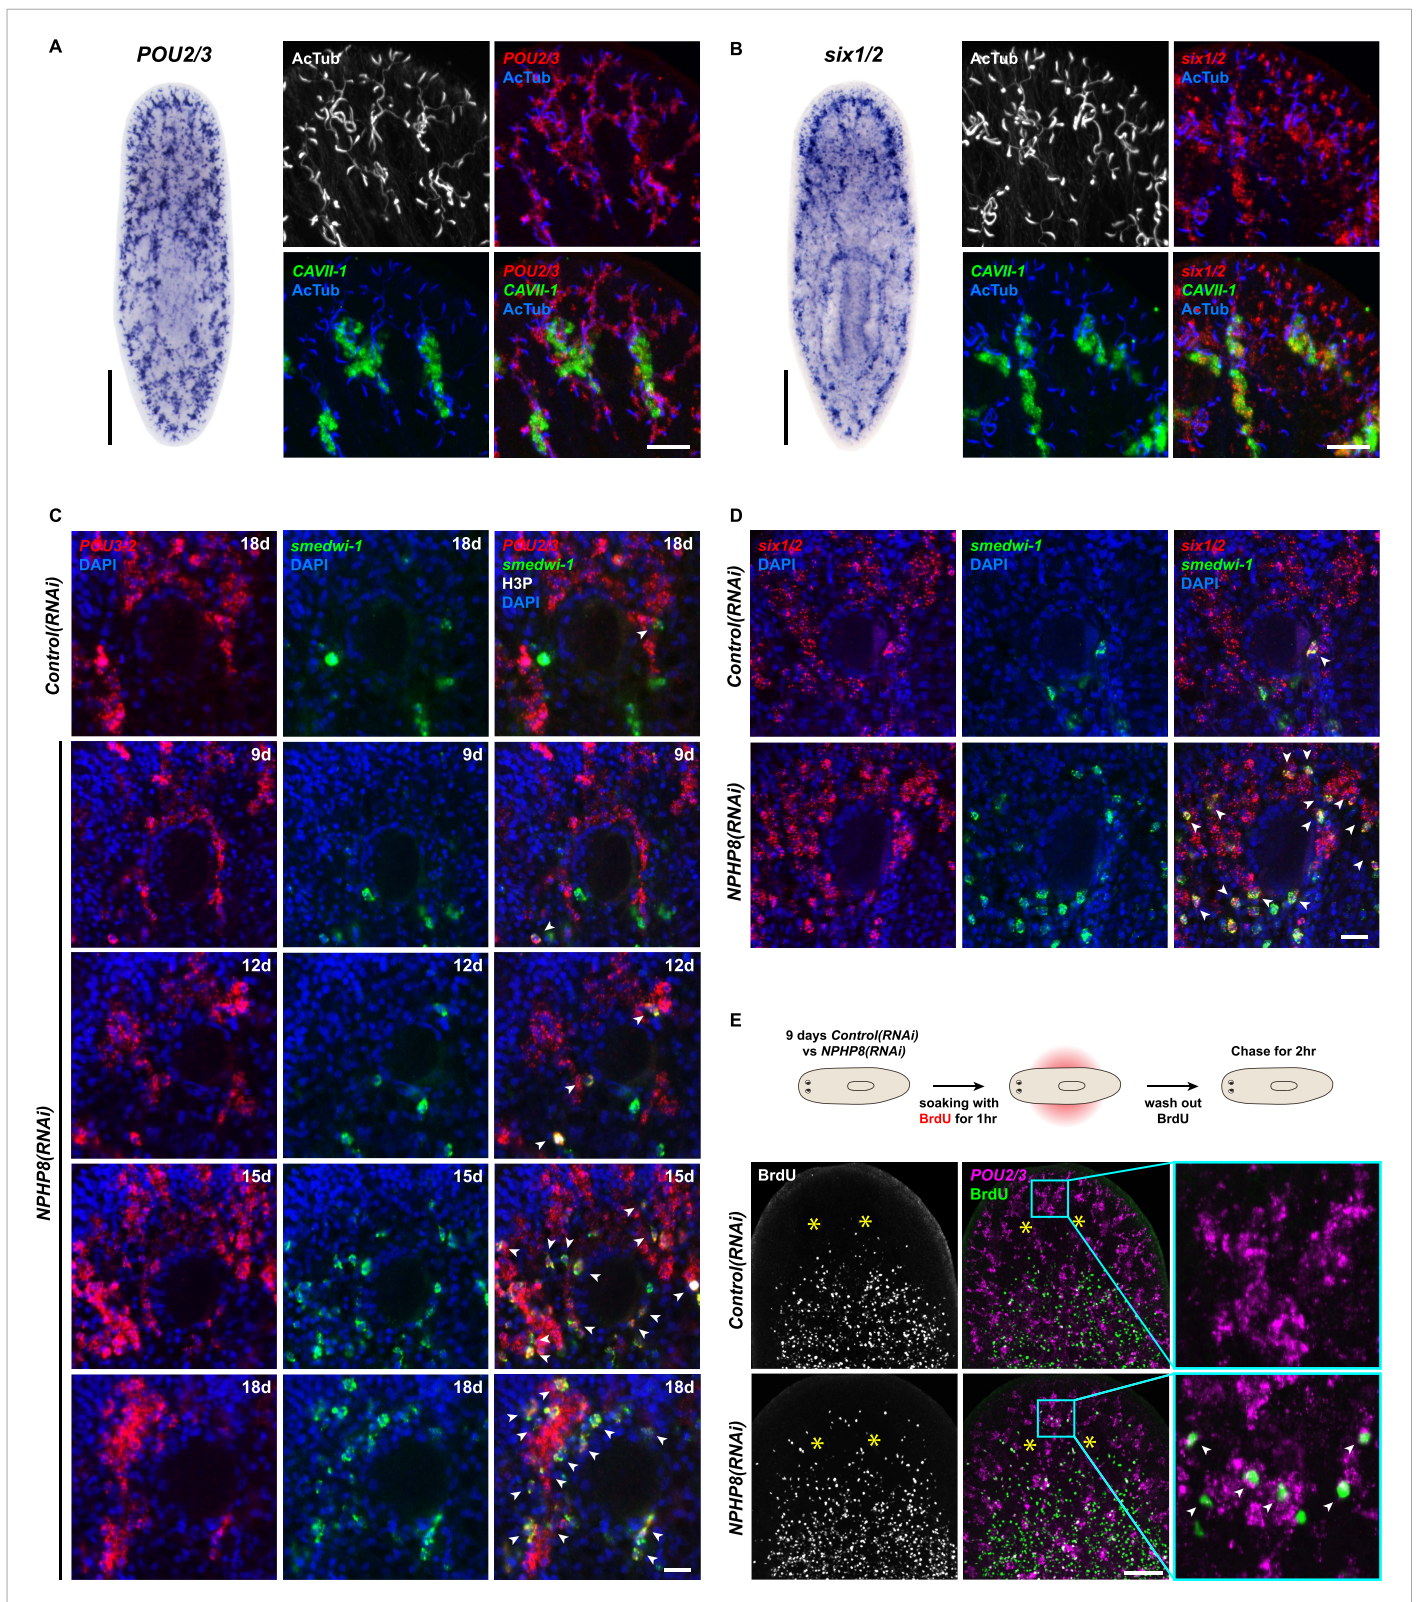

**Figure 6—figure supplement 1.** Increase of protonephridial progenitors during cystogenesis in planarian protonephridia. **(A)** Left: Whole-mount expression patterns of *POU2/3* by in situ hybridization. Scale bars: 500  $\mu$ m. Right: Fluorescent overlay of *POU2/3* with DT marker (*CAVII-1*) and AcTub. Scale bar: 50  $\mu$ m. **(B)** Left: Whole-mount expression patterns of *six1/2* by in situ hybridization. Scale bars: 500  $\mu$ m. Right: Fluorescent overlay of *six1/2* with *CAVII-1* and AcTub. Scale bar: 50  $\mu$ m. **(C)** Time course of *POU2/3* and *smedwi-1* expression in Control(RNAi) and NPHP8(RNAi) conditions. Scale bars: 50  $\mu$ m. **(D)** Time course of *six1/2* and *smedwi-1* expression in Control(RNAi) and NPHP8(RNAi) conditions. Scale bars: 50  $\mu$ m. **(E)** BrdU labeling and chase experiment. Scale bars: 50  $\mu$ m.



Figure 6—figure supplement 1. Continued

DT marker (*CAVII-1*) and AcTub. Scale bar: 50  $\mu$ m. (C, D) Magnified view showing the region surrounding photoreceptor. Fluorescent overlay of *POU2/3* and *six1/2* with pan stem cell marker *Smedwi-1* and mitotic marker H3P. Scale bar: 50  $\mu$ m. (E) Increase of S-phase protonephridial progenitors during cystogenesis in planarian protonephridia. Intact *Control(RNAi)* and *NPHP8(RNAi)* animals were pulsed with BrdU (1 hr), followed by 2 hr-chase. Fluorescent overlay of *POU2/3* with BrdU showing the abnormal increase of *POU2/3*<sup>+</sup>/BrdU<sup>+</sup> in the head region anterior to the photoreceptors. Images are maximum projections of confocal Z-sections. Scale bar: 100  $\mu$ m.

DOI: [10.7554/eLife.07405.040](https://doi.org/10.7554/eLife.07405.040)

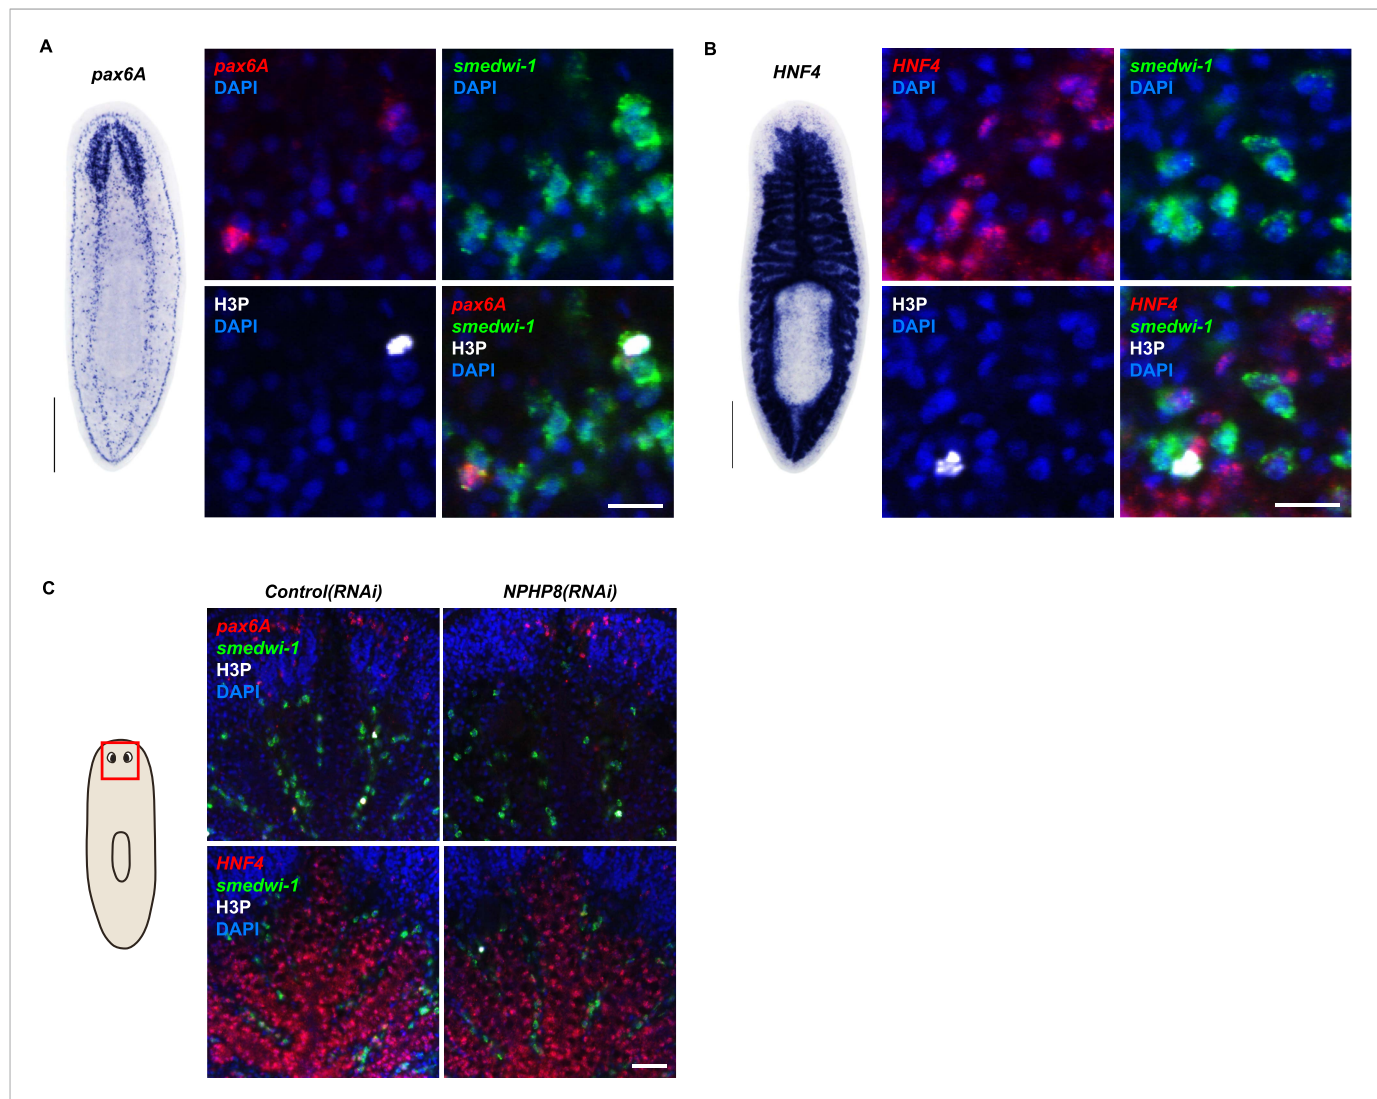

**Figure 6—figure supplement 2.** Gut and brain progenitors in *NPHP8(RNAi)* animals. (A, B) Left panel: whole-mount expression patterns of *pax6A* (A) and *HNF4* (B) by in situ hybridization. Scale bars: 500  $\mu$ m; Right panel: fluorescent overlay of (A) *pax6A* and (B) *HNF4* with pan stem cell marker (*Smedwi-1*) and mitotic marker (H3P). Scale bar: 50  $\mu$ m. (C) Magnified view showing the head region. Fluorescent overlay of *pax6A* and *HNF4* with pan stem cell marker *Smedwi-1* and mitotic marker H3P. Scale bar: 50  $\mu$ m.

DOI: [10.7554/eLife.07405.041](https://doi.org/10.7554/eLife.07405.041)

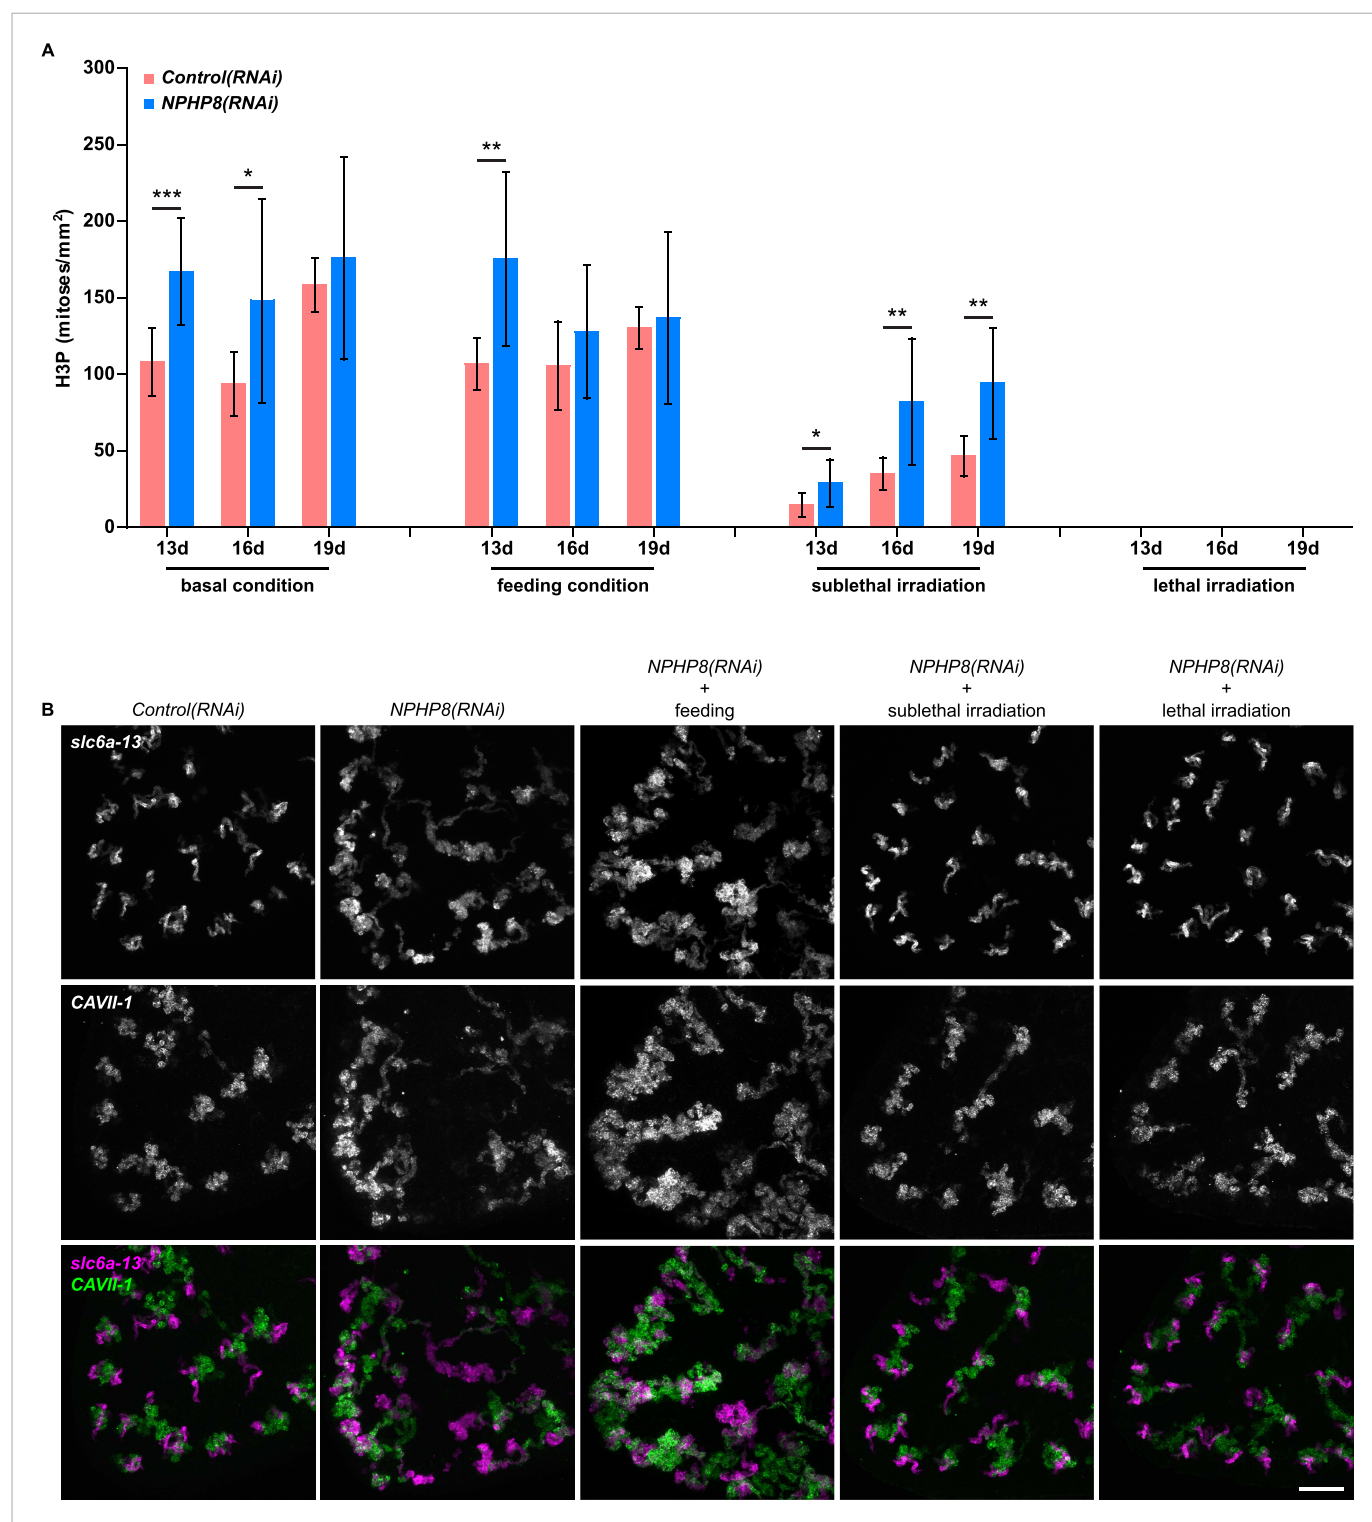

**Figure 6—figure supplement 3.** The severity of cystic phenotype in protonephridia depends on proliferation rate and requires the presence of stem cells. **(A)** Quantification of mitoses in *Control(RNAi)* and *NPHP8(RNAi)* animals. Experimental paradigm is described in **Figure 5F**. The time point in the bar graph indicates the number of the day after the first dsRNA introduction. **(B)** The severity of cystic phenotype in protonephridia depends on the rate of proliferation and requires the presence of stem cells. Fluorescent overlay of PT marker (*slc6a-13*) with DT marker (*CAVII-1*). Images are maximum projections of confocal Z-sections. Scale bar: 100  $\mu$ m.

DOI: [10.7554/eLife.07405.042](https://doi.org/10.7554/eLife.07405.042)

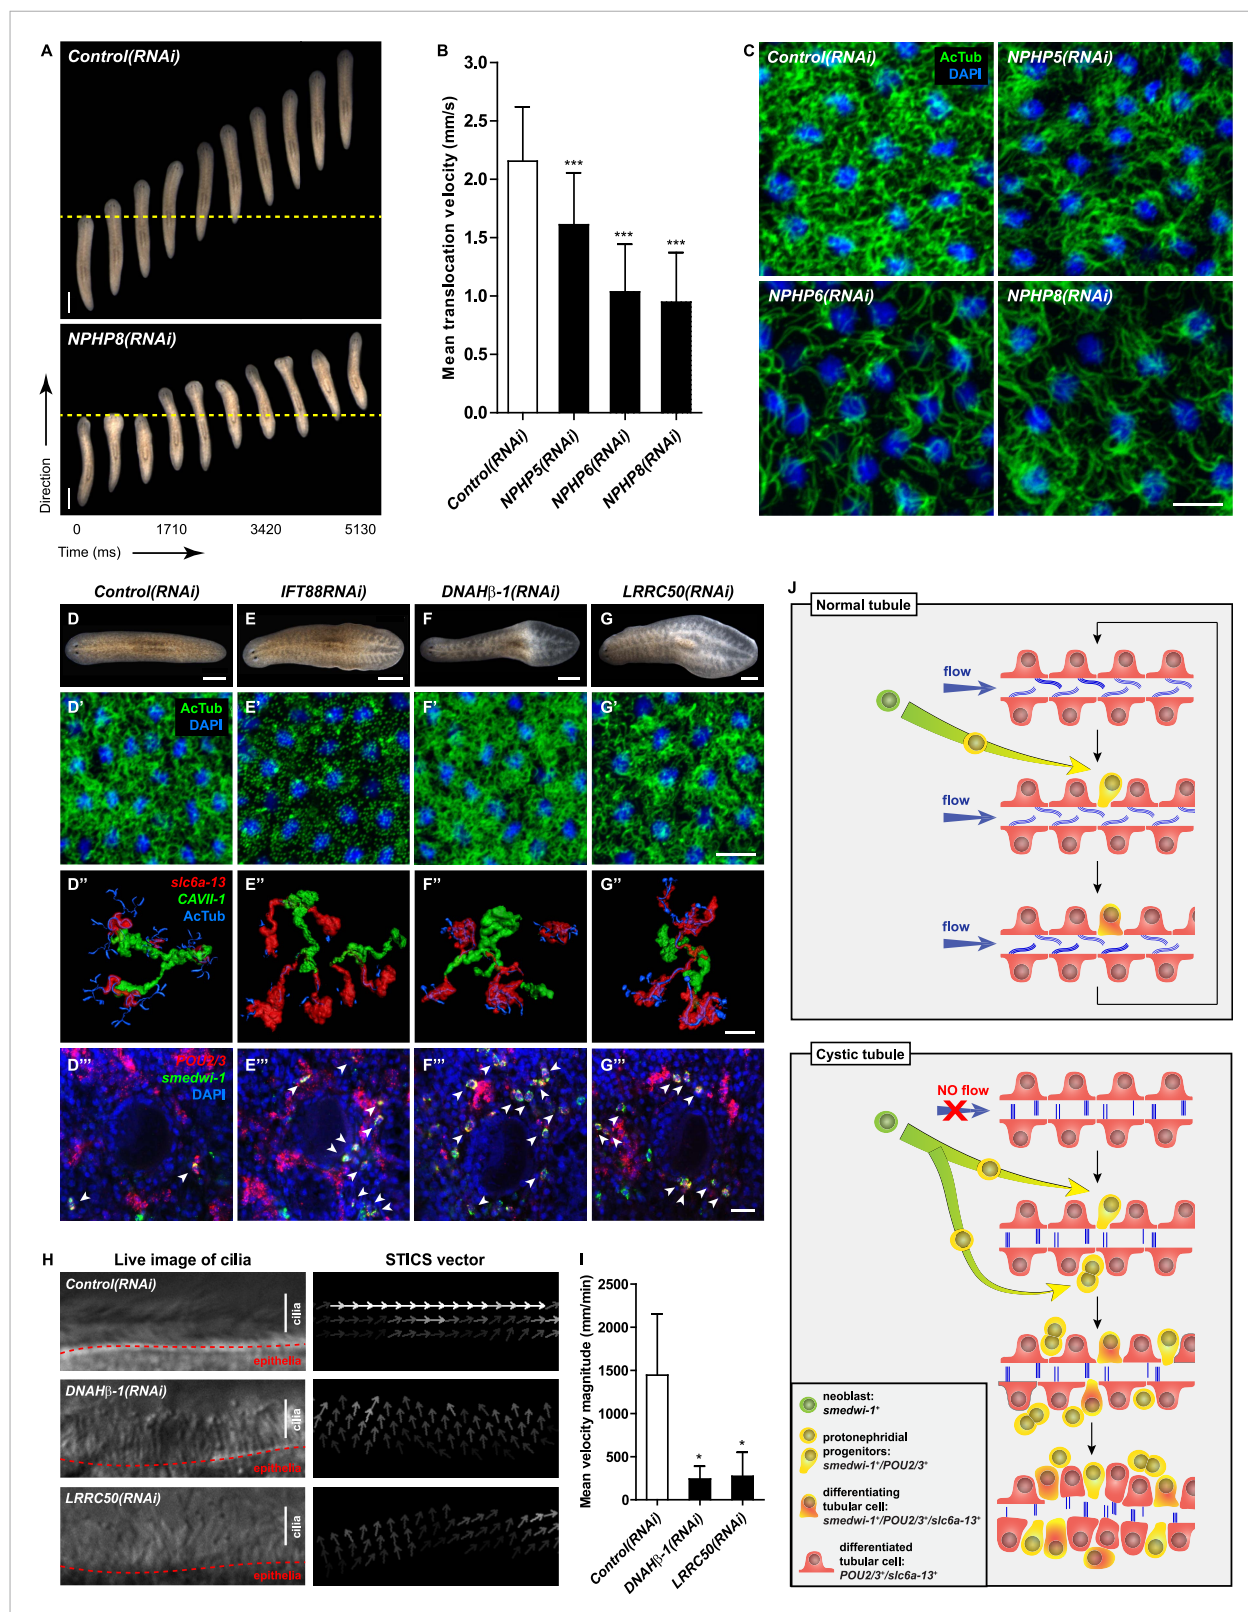

**Figure 7.** Cystic phenotype in protonephridia is cilia- and fluid flow-dependent. **(A)** Series of live images show gliding mobility in *Control(RNAi)* and *NPHP8(RNAi)* animals. Yellow dot line provides a spatial reference to illustrate progress of animal. Scale bar: 1 mm. **(B)** Quantification of translocation speed in indicated RNAi animals. Error bar, SD; \*\*\*  $p < 0.001$  vs control. **(C)** Fluorescent overlay of ventral cilia (AcTub) with nucleus marker (DAPI) in Figure 7. continued on next page



Figure 7. Continued

indicated RNAi animals. Scale bar: 10  $\mu\text{m}$ . (D–G) Live images show bloating phenotype in *IFT88(RNAi)*, *DNAH $\beta$ -1(RNAi)*, and *LRRC50(RNAi)* animals. Scale bar: 500  $\mu\text{m}$ . (D'–G') Fluorescent overlay of ventral cilia (AcTub) with nucleus marker (DAPI) in *IFT88(RNAi)*, *DNAH $\beta$ -1(RNAi)*, and *LRRC50(RNAi)* animals. Scale bar: 10  $\mu\text{m}$ . (D''–G'') 3D rendering showing fluorescent overlay of AcTub staining with PT2 and PT3 marker (*slc6a-13*) and DT marker (*CAVII-1*) in *Control(RNAi)*, *IFT88(RNAi)*, *DNAH $\beta$ -1(RNAi)*, and *LRRC50(RNAi)* animals. Scale bar: 50  $\mu\text{m}$ . (D'''–G''') Magnified view shows fluorescent overlay of *POU2/3* with pan stem cell marker (*smewi-1*) in the region surrounding photoreceptor. White arrowhead shows *POU2/3<sup>+</sup>/smewi-1<sup>+</sup>* cell. Scale bar: 25  $\mu\text{m}$ . (H–I) Abnormal cilia beating in *DNAH $\beta$ -1(RNAi)*, and *LRRC50(RNAi)* animals. (H) Left panel: live images show cilia beating along the lateral body edge of the planarian head region; Right panel: vector map generated by Spatiotemporal image correlation spectroscopy (STICS) analysis shows velocity magnitude and beating pattern of cilia. The brightness of the vector represents the velocity magnitude of the cilia: brighter vector, stronger ciliary beating or vice versa. (I) Quantification of ciliary velocity magnitude in indicated RNAi animals. \*  $p < 0.05$  vs control. (J) Cartoon represents working model of cyst formation in the planarian protonephridia. In normal tubule, protonephridial tubular cell turnover is maintained by integration of protonephridial progenitors, originated from the neoblasts, into the tubule. During this process, cilia-driven fluid flow is required for the maintenance of tubular geometry. Obstruction of fluid flow by disrupting cilia function leads to protonephridial cystogenesis that characterized by abnormal proliferation of protonephridial progenitors, tubular enlargement and disorganization.

DOI: 10.7554/eLife.07405.043

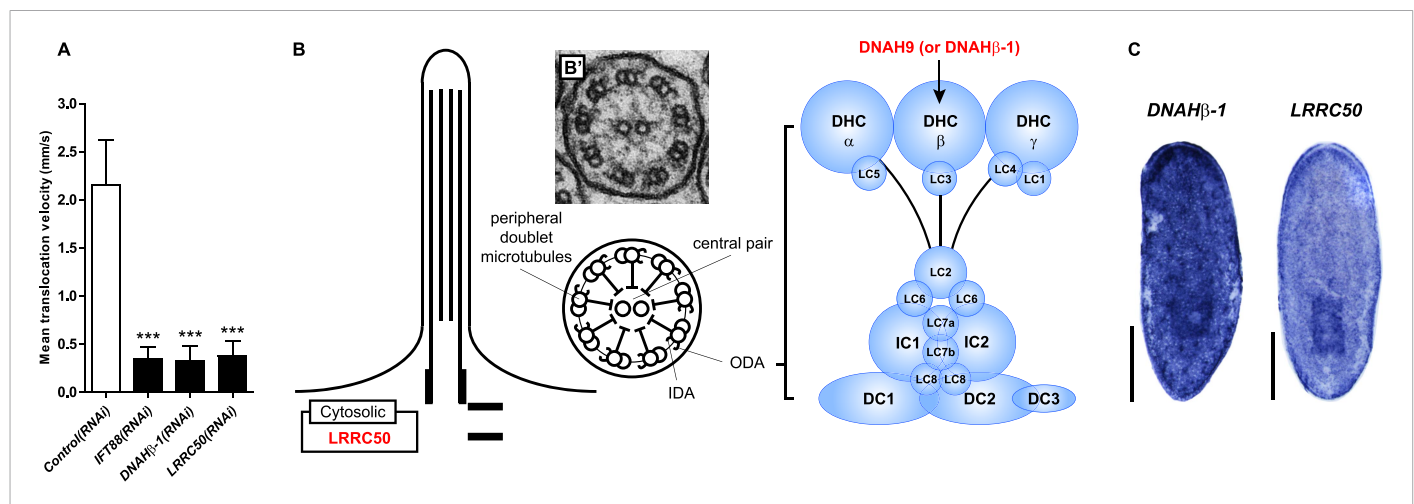

**Figure 7—figure supplement 1.** Primary Ciliary Dyskinesia (PCD) genes in the planarian *S. mediterranea*. (A) Quantification of translocation speed in indicated RNAi animals. Error bar, SD; \*\*\*  $p < 0.001$  vs control. (B) Schematic drawing shows the structure of 9 + 2 motile cilia in planarians. Right panel: schematic representation of the expanded view of the ODA depicts several light, intermediate, and heavy chains. The planarian homologs of human PCD genes with the ODA defects indicated in this study are labeled in red (*DNAH $\beta$ -1* and *LRRC50*). (B') TEM image shows cross-section through a cilium of the protonephridial tubule. IDA, inner dynein arm; ODA, outer dynein arm; DHC, dynein heavy chain; LC, dynein light chain; IC, dynein intermediate chain; DC, docking complex. (C) Whole-mount expression patterns of *DNAH $\beta$ -1* and *LRRC50* by in situ hybridization. Scale bars: 500  $\mu\text{m}$ .

DOI: 10.7554/eLife.07405.044



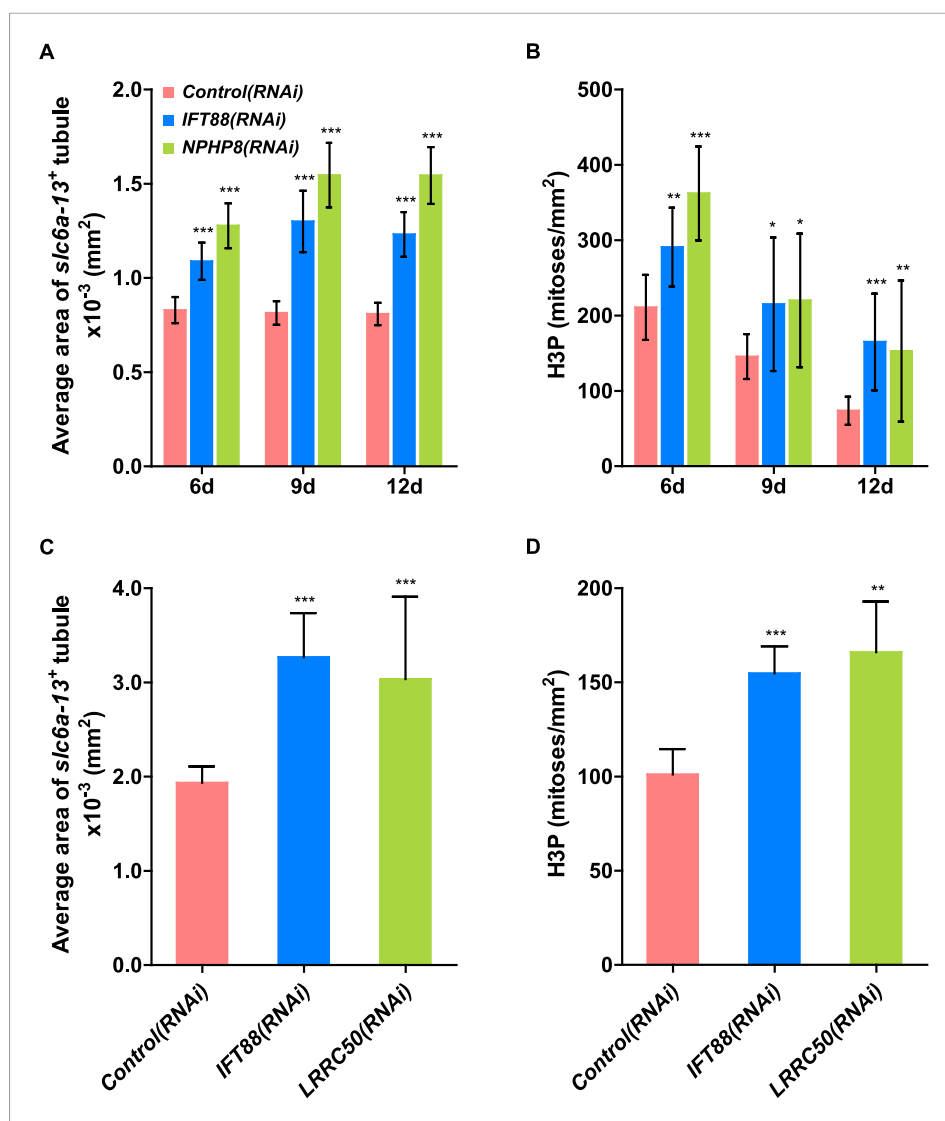

**Figure 7—figure supplement 2.** Cystogenesis in planarian protonephridia under *IFT88(RNAi)* is correlated with increased proliferation. **(A)** Quantification of average area of each *slc6a13*<sup>+</sup> tubule (right) in *Control(RNAi)*, *IFT88(RNAi)* and *NPHP8(RNAi)* animals to evaluate the severity of protonephridial cystogenesis. **(B)** Quantification of mitoses in *Control(RNAi)*, *IFT88(RNAi)* and *NPHP8(RNAi)* animals. *NPHP8(RNAi)* animals served as a positive control in this set of experiment. The time points in the bar graph indicate the number of day after the last dsRNA introduction. **(C)** Quantification of average area of each *slc6a13*<sup>+</sup> tubule (right) in *Control(RNAi)*, *IFT88(RNAi)* and *LRRC50(RNAi)* animals to evaluate the severity of protonephridial cystogenesis. **(D)** Quantification of mitoses in *Control(RNAi)*, *IFT88(RNAi)* and *LRRC50(RNAi)* animals. \*  $p < 0.05$ ; \*\*  $p < 0.01$ ; \*\*\*  $p < 0.001$  vs control. DOI: [10.7554/eLife.07405.045](https://doi.org/10.7554/eLife.07405.045)
